## Potent Human Broadly SARS-CoV-2 Neutralizing IgA and IgG Antibodies Effective Against Omicron BA.1 and BA.2

Cyril Planchais<sup>1,2</sup>, Ignacio Fernández<sup>3,4</sup>, Timothée Bruel<sup>4,5,17</sup>, Guilherme Dias de Melo<sup>6,17</sup>, Matthieu Prot<sup>7,17</sup>, Maxime Beretta<sup>1,2</sup>, Pablo Guardado-Calvo<sup>3,4</sup>, Jérémy Dufloo<sup>4,5</sup>, Luis M. Molinos-Albert<sup>1,2</sup>, Marija Backovic<sup>3,4</sup>, Jeanne Chiaravalli<sup>8</sup>, Emilie Giraud<sup>8</sup>, Benjamin Vesin<sup>9,10</sup>, Laurine Conquet<sup>11</sup>, Ludivine Grzelak<sup>4,5</sup>, Delphine Planas<sup>4,5</sup>, Isabelle Staropoli<sup>4,5</sup>, Florence Guivel-Benhassine<sup>4,5</sup>, Mikaël Boullé<sup>8</sup>, Minerva Cervantes-Gonzalez<sup>12</sup>, French COVID Cohort Study Group, CORSER Study Group, Marie-Noëlle Ungeheuer<sup>13</sup>, Pierre Charneau<sup>9,10</sup>, Sylvie van der Werf<sup>4,14,15</sup>, Fabrice Agou<sup>8</sup>, Jordan D. Dimitrov<sup>16</sup>, Etienne Simon-Lorière<sup>7,18</sup>, Hervé Bourhy<sup>6,18</sup>, Xavier Montagutelli<sup>11,18</sup>, Félix A. Rey<sup>3,4,18\*</sup>, Olivier Schwartz<sup>4,5,18</sup>, Hugo Mouquet<sup>1,2,19\*</sup>

<sup>1</sup>Institut Pasteur, Université Paris Cité, Laboratory of Humoral Immunology, F-75015 Paris, France

<sup>2</sup>INSERM U1222, F-75015 Paris, France

<sup>3</sup>Institut Pasteur, Université Paris Cité, Structural Virology Unit, F-75015 Paris, France

<sup>4</sup>CNRS UMR3569, F-75015 Paris, France

<sup>5</sup>Institut Pasteur, Université Paris Cité, Virus & Immunity Unit, F-75015 Paris, France

<sup>6</sup>Institut Pasteur, Université Paris Cité, Lyssavirus Epidemiology and Neuropathology Unit, F-75015 Paris, France

<sup>7</sup>Institut Pasteur, Université Paris Cité, G5 Evolutionary Genomics of RNA Viruses, F-75015 Paris, France

<sup>8</sup>Institut Pasteur, Université Paris Cité, Chemogenomic and Biological Screening Core Facility, C2RT, F-75015 Paris, France

<sup>9</sup>Pasteur-TheraVectys, F-75015 Paris, France

<sup>10</sup>Institut Pasteur, Université Paris Cité, Molecular Virology & Vaccinology Unit, F-75015 Paris, France

<sup>11</sup>Institut Pasteur, Université Paris Cité, Mouse Genetics Laboratory, F-75015 Paris, France

<sup>12</sup>Department of Epidemiology, Biostatistics and Clinical Research, Assistance Publique-Hôpitaux de Paris, Bichat Claude Bernard University Hospital, INSERM CIC-EC 1425, Paris, France

<sup>13</sup>Institut Pasteur, Université Paris Cité, Investigation Clinique et Accès aux Ressources Biologiques (ICAReB), Center for Translational Research, F-75015 Paris, France

<sup>14</sup>Institut Pasteur, Université Paris Cité, Molecular Genetics of RNA Viruses, F-75015 Paris, France

<sup>15</sup>Université de Paris, Paris, France

<sup>16</sup>Centre de Recherche des Cordeliers, INSERM, Sorbonne Université, Université de Paris, 75006 Paris, France

<sup>17</sup>Equal contribution.

<sup>18</sup>These senior authors contributed equally.

<sup>19</sup>Lead contact.

\*Correspondence: [hugo.mouquet@pasteur.fr](mailto:hugo.mouquet@pasteur.fr) (H.M.); [felix.rey@pasteur.fr](mailto:felix.rey@pasteur.fr) (F.A.R.).

1 **Abstract**

2 Memory B-cell and antibody responses to the SARS-CoV-2 spike protein contribute to long-  
3 term immune protection against severe COVID-19, which can also be prevented by antibody-  
4 based interventions. Here, wide SARS-CoV-2 immunoprofiling in COVID-19 convalescents  
5 combining serological, cellular and monoclonal antibody explorations, revealed humoral  
6 immunity coordination. Detailed characterization of a hundred SARS-CoV-2 spike memory B-  
7 cell monoclonal antibodies uncovered diversity in their repertoire and antiviral functions. The  
8 latter were influenced by the targeted spike region with strong Fc-dependent effectors to the  
9 S2 subunit and potent neutralizers to the receptor binding domain. Amongst those, Cv2.1169  
10 and Cv2.3194 antibodies cross-neutralized SARS-CoV-2 variants of concern including  
11 Omicron BA.1 and BA.2. Cv2.1169, isolated from a mucosa-derived IgA memory B cell,  
12 demonstrated potency boost as IgA dimers and therapeutic efficacy as IgG antibodies in  
13 animal models. Structural data provided mechanistic clues to Cv2.1169 potency and breadth.  
14 Thus, potent broadly neutralizing IgA antibodies elicited in mucosal tissues can stem SARS-  
15 CoV-2 infection, and Cv2.1169 and Cv2.3194 are prime candidates for COVID-19 prevention  
16 and treatment.

## 17 **Introduction**

18 The coronavirus disease 2019 (COVID-19) is caused by the severe acute respiratory  
19 syndrome coronavirus 2 (SARS-CoV-2), and accounts to date for nearly 480 million infection  
20 cases and 6 million deaths worldwide (WHO, 2022). SARS-CoV-2 infects host cells through  
21 interactions of its surface envelope protein, or spike, with the cellular angiotensin-converting  
22 enzyme 2 (ACE2) receptor (Hoffmann et al., 2020; Lan et al., 2020). The SARS-CoV-2 spike  
23 (S) is a homo-trimeric glycoprotein with each protomer composed of subunits S1 and S2 (Ke  
24 et al., 2020; Walls et al., 2020; Wrapp et al., 2020). S1 contains the N-terminal domain (NTD)  
25 and the receptor binding domain (RBD) that interacts with ACE2, while S2 mediates viral fusion  
26 (Lan et al., 2020; Yan et al., 2020). Antibodies rapidly develop in response to SARS-CoV-2  
27 infection (Long et al., 2020; Sette and Crotty, 2021), including neutralizing antibodies  
28 recognizing distinct S protein regions (Schmidt et al., 2021). The RBD is the primary target of  
29 neutralizing antibodies including potent neutralizers, albeit the NTD and S2 stem region also  
30 contain neutralizing epitopes (Andreano et al., 2021; Brouwer et al., 2020; Chi et al., 2020; Ju  
31 et al., 2020; Liu et al., 2020; Pinto et al., 2021; Rogers et al., 2020; Wec et al., 2020; Zost et  
32 al., 2020a). SARS-CoV-2 neutralizing IgA antibodies, detected as early as a week after onset  
33 of symptoms, contribute to seroneutralization and can be as potent as IgGs (Sterlin et al.,  
34 2021; Wang et al., 2021b). Neutralizing antibodies are the main correlate of protection for  
35 COVID-19 vaccines (Krammer, 2021). Still, SARS-CoV-2 spike-specific antibodies, including  
36 non-neutralizers, can exert antiviral Fc-dependent effector functions important for *in vivo*  
37 protection *i.e.*, antibody-dependent cellular cytotoxicity (ADCC), and phagocytosis (ADCP)  
38 (Chertow et al., 2021; Dufloo et al., 2021; Schäfer et al., 2021). Unprecedented global efforts  
39 have been undertaken to develop effective vaccines and prophylactic/therapeutic strategies to  
40 fight COVID-19 (Kelley, 2020). Immunotherapies based on SARS-CoV-2 neutralizing  
41 antibodies have been rapidly explored, and this led to the clinical use of several monoclonal  
42 antibodies (mAbs) alone or in bi-therapies (Corti et al., 2021). Highly potent human SARS-  
43 CoV-2 neutralizing mAbs isolated so far, including those tested or used in clinics, all target the  
44 RBD and can prevent infection and/or protect animals from severe disease in preclinical

45 models (Andreano et al., 2021; Cao et al., 2020; Corti et al., 2021; Kreye et al., 2020; Noy-  
46 Porat et al., 2021; Rogers et al., 2020; Rosenfeld et al., 2021; Shi et al., 2020; Tortorici et al.,  
47 2020; Zost et al., 2020b). However, viral variants with spike mutations conferring resistance to  
48 antibody neutralization emerged during the pandemics and annihilated some of these  
49 therapies (Kumar et al., 2021; Planas et al., 2021b, 2021a; Radvak et al., 2021). The search  
50 for broadly neutralizing mAbs is being pursued. Novel antibodies active against all variants of  
51 concern (VOCs), including the currently prevalent omicron lineage, have been described  
52 (Cameroni et al., 2022; Gruell et al., 2022; Westendorf et al., 2022).

53 Here, we report on the detailed molecular and functional characterization of 102 human  
54 SARS-CoV-2 spike mAbs cloned from IgG and IgA memory B cells of ten convalescent  
55 COVID-19 individuals. These antibodies are encoded by a diverse set of immunoglobulin  
56 genes, recognize various conformational spike protein epitopes, and predominantly bind the  
57 S2 subunit. No anti-S2 mAbs were neutralizing but many harboured Fc-dependent effector  
58 functions. A third of the RBD-targeting antibodies potently neutralized SARS-CoV2 *in vitro*.  
59 The most potent, Cv2.1169 IgA and Cv2.3194 IgG, were fully active against VOCs Alpha, Beta,  
60 Gamma, and Delta, and still strongly blocked Omicron BA.1 and BA.2 infection *in vitro*. J-chain  
61 dimerization of Cv2.1169 IgA greatly improved its neutralization potency against BA.1 and  
62 BA.2. Cv2.1169 showed therapeutic efficacy in mouse and hamster SARS-CoV-2 infection  
63 models. Structural analyses by cryo-EM and X-ray crystallography revealed the mode of  
64 binding of Cv2.1169 and its contacts with the RBD at atomic level. Collectively, this study  
65 allowed gaining insights into fundamental aspects of the SARS-CoV-2-specific humoral  
66 response, and identified potent and broad neutralizers with prophylactic and therapeutic  
67 potential.

## 68 **Results**

### 69 **Serological antibody profiling of COVID-19 convalescents**

70 In convalescent COVID-19 individuals, serum antibody levels against the spike and RBD  
71 proteins have been correlated to SARS-CoV-2 seroneutralizing activities (Grzelak et al., 2020;  
72 Robbiani et al., 2020; Wang et al., 2021b). To select for convalescent donors with high  
73 seroneutralization for single B-cell antibody cloning, we first evaluated the IgG and IgA  
74 seroreactivity of convalescent individuals infected during the first epidemic wave (n=42 with  
75 bio-banked PBMC) to soluble recombinant Wuhan SARS-CoV-2 trimeric spike (tri-S) and RBD  
76 proteins by ELISA. Most of them had high titers of anti-tri-S IgGs, mainly IgG1, including cross-  
77 reacting antibodies against the Middle East respiratory syndrome-related coronavirus (MERS-  
78 CoV) tri-S protein (**Figures 1A, 1B, S1A and S1B**). High levels of serum anti-RBD IgGs were  
79 also detected (**Figures 1A, 1B, S1A and S1B**), and correlated with anti-tri-S antibody titers  
80 (**Figure S1C**). Although the SARS-CoV-2 seroreactivity of IgA antibodies was globally weaker  
81 than for IgGs, both were correlated (**Figures 1B, S1B and S1C**). Serum IgA and IgG antibodies  
82 from the ten donors with the highest anti-SARS-CoV-2 tri-S antibody titers (purple dots; **Figure**  
83 **1A**) were purified, and showed strong ELISA binding to Wuhan nucleocapsid (N), tri-S, S1 and  
84 S2 subunits, and RBD, and also cross-reacted against recombinant spike proteins from other  
85  $\beta$ -coronaviruses (SARS-CoV-1, MERS-CoV, HKU1 and OC43) as well as  $\alpha$ -coronaviruses  
86 (229E and NL63) (**Figures 1C, S1D, and S1E**). The neutralizing activity of purified serum IgA  
87 and IgG antibodies against the Wuhan SARS-CoV-2 strain was then determined using an *in*  
88 *vitro* pseudoneutralization assay (**Figure 1D**). Fifty percent inhibitory concentrations ( $IC_{50}$ ) of  
89 purified IgA antibodies were in average lower as compared to IgGs (70.4 vs 115.6  $\mu$ g/ml for  
90 IgAs and IgGs, respectively,  $p=0.068$ ), ranging from 43 to 133  $\mu$ g/ml for IgAs, and from 21 to  
91 257  $\mu$ g/ml for IgGs (**Figure 1D**).  $IC_{50}$  values for IgA but not IgG antibodies were negatively  
92 correlated to their respective binding levels to SARS-CoV-2 S1 and RBD proteins (**Figure**  
93 **S2A**).

94

95 **Human SARS-CoV-2 spike-specific memory B-cell antibodies from COVID-19**  
96 **convalescents**

97 Next, peripheral blood IgA<sup>+</sup> and IgG<sup>+</sup> memory B cells from the selected convalescent  
98 individuals were stained with fluorescently-labeled RBD and tri-S, the latter being used as a  
99 bait to capture single SARS-CoV-2-reactive B cells by flow cytometric sorting (**Figure 1E**).  
100 From the 2870 SARS-CoV-2 tri-S<sup>+</sup> IgA<sup>+</sup>/G<sup>+</sup> memory B cells isolated, we produced a total of  
101 133 unique human mAbs by recombinant expression cloning (Tiller et al., 2008), with most of  
102 them being part of B-cell clonal expansions (**Figure 1F**). ELISA and flow cytometry-based (S-  
103 Flow) binding analyses showed that 101 purified mAbs specifically bind to SARS-CoV-2 S  
104 protein (76% [40-100%]; **Figures 1F** and **S1F**). RBD-binding cells represented 11% and 17%  
105 of the tri-S<sup>+</sup> IgA<sup>+</sup> and IgG<sup>+</sup> B cells, respectively (**Figure 2A**). Anti-RBD IgA titers were correlated  
106 with blood RBD<sup>+</sup> IgA<sup>+</sup> B-cell frequencies, and inversely correlated with neutralization IC<sub>50</sub>  
107 values of IgAs (**Figure S2A**). Both total and SARS-CoV-2 tri-S-specific class-switched memory  
108 B cells showed a resting memory B-cell phenotype (RM, CD19<sup>+</sup>CD27<sup>+</sup>CD21<sup>+</sup>) (**Figures 2B-**  
109 **2D**). The frequency of circulating blood follicular helper T cell (cTfh) subsets was also  
110 determined. We found that cTfh2 (CD4<sup>+</sup>CXCR5<sup>+</sup>CCR6<sup>-</sup>CXCR3<sup>-</sup>), with a high proportion being  
111 activated (PD1<sup>+/high</sup> and/or ICOS<sup>+</sup>), were predominant (**Figures 2E** and **2F**), and correlated with  
112 tri-S<sup>+</sup> IgG<sup>+</sup> RM B cells (r=0.83; p=0.0098) (**Figures 2G** and **S2B**), illustrating their capacity to  
113 promote class switching and affinity maturation of B cells as previously shown (Locci et al.,  
114 2013; Morita et al., 2011). Comparison of immunoglobulin gene features with IgG<sup>+</sup> memory B  
115 cells from healthy controls (Prigent et al., 2016) revealed an increased usage in the SARS-  
116 CoV-2 spike-specific B-cell repertoire of rearranged V<sub>H</sub>3V<sub>λ</sub>3 (p=0.0047) and V<sub>λ</sub>3/J<sub>λ</sub>2  
117 (p=0.0019), J<sub>H</sub>4 (p=0.0312), and J<sub>κ</sub>4 (p=0.0387) genes, as well as IgG1 subclass (p=0.0001)  
118 (**Figures 2H** and **S2**; **Table S1**). Anti-spike antibodies were also enriched in V<sub>H</sub>1-24/-69 and  
119 V<sub>H</sub>3-30/-33 genes (**Figure S2J**) as previously observed (Brouwer et al., 2020; Kreer et al.,  
120 2020; Vanshylla et al., 2022), and had reduced CDR<sub>H</sub>3 positive charges (p=0.0001) and  
121 somatic mutations in IgH (9.5 vs 19.2, p<0.0001) and Igλ (6.8 vs 12.4, p<0.0001) (**Figures 2H,**  
122 **2I**, and **S2H**; **Table S1**). Certain antibody clones were shared among several of the COVID-

123 19 convalescents (**Figure 2J**), demonstrating further the inter-individual convergence of  
124 antibody responses to SARS-CoV-2 as observed by others (Brouwer et al., 2020; Chen et al.,  
125 2021; Galson et al., 2020; Kreye et al., 2020; Nielsen et al., 2020; Robbiani et al., 2020;  
126 Vanshylla et al., 2022).

127

## 128 **Binding and antiviral properties of human anti-SARS-CoV-2 spike antibodies**

129 Epitope mapping analyses showed that 59% of the anti-S mAbs (n=101) bind to the S2 subunit,  
130 16% the RBD, 17% the NTD, 1% the S1 connecting domain (CD), and 7% to other regions of  
131 the SARS-CoV-2 spike (**Figures 3A and 3B; Table S1**). Only one anti-S antibody (0.99% of  
132 the total) targeting S2 recognized the denatured tri-S protein by immunoblotting, but did not  
133 bind S-covering linear peptides (**Figures S3A-S3C**), indicating that most SARS-CoV-2-S  
134 memory antibodies target conformational epitopes. To determine whether anti-spike memory  
135 antibodies neutralize the Wuhan strain, we measured their inhibitory activity using three  
136 different *in vitro* functional assays: a competition ELISA measuring the blockage of soluble tri-  
137 S or RBD binding to ACE2 ectodomain, a pseudoneutralization assay and a neutralizing assay  
138 using live virus called S-Fuse (Sterlin et al., 2021) (**Figure 3C**). Overall, ~ 15% of the anti-S  
139 mAbs showed inhibitory activities > 50% in the S-Fuse assay, many of which also neutralized  
140 pseudotyped SARS-CoV-2 virions and blocked tri-S-ACE2 interactions (**Figure 3C; Table S1**).  
141 Potent neutralizers targeted the RBD (**Table S1**), but only 50% of all anti-RBD mAbs blocked  
142 SARS-CoV-2 infection with IC<sub>50</sub> values < 10 µg/ml (**Figures 3C, 3F and 3G; Table S1**).

143 SARS-CoV-2 antibodies can be armed with Fc-dependent effector functions allowing the  
144 elimination of virions and infected cells (Dufloo et al., 2021), which can alter the course of  
145 infection *in vivo* (Schäfer et al., 2021; Winkler et al., 2021). We evaluated the *in vitro* capacity  
146 of anti-S mAbs to promote antibody dependent cellular cytotoxicity (ADCC), antibody  
147 dependent cellular phagocytosis (ADCP) and complement dependent cytotoxicity (CDC). On  
148 average, 41.6%, 74.2% and 42.6% of the IgG antibodies displayed ADCC, ADCP and CDC  
149 activity, respectively (**Figure 3D**). Effector activities of SARS-CoV-2 antibodies were globally  
150 correlated (**Figure 3E**). ADCC- and ADCP-inducing antibodies were directed principally

151 against S2 (50% and 85%, respectively) and the NTD (53% and 76%, respectively) (**Figure**  
152 **3F; Table S1**). Conversely, anti-RBD antibodies as a group were less efficient at performing  
153 ADCC, and to a lesser extent ADCP (**Figure 3F; Table S1**). SARS-CoV-2 mAbs with CDC  
154 potential targeted mainly the NTD (59% of anti-NTD) and the RBD (56% of anti-RBD) (**Figure**  
155 **3F; Table S1**). Accordingly, CDC and tri-S-ACE2 blocking activities were correlated (**Figure**  
156 **3E**). Principal-component analyses (PCA) showed that neutralizing and Fc-dependent effector  
157 functions segregated into two separate clusters in the PCA of antiviral functions, with 77% of  
158 the variance reached when combining the two first principal components (**Figure 3G**). The  
159 “neutralization” cluster included mainly anti-RBD antibodies, while the “effector” cluster  
160 comprised both NTD- and S2-specific IgGs (**Figure 3G**).

161

#### 162 **Antibody features of potent SARS-CoV-2 neutralizers**

163 In the collection of 101 anti-S mAbs, 5 potent SARS-CoV-2 neutralizing antibodies were  
164 identified (**Table S1**). They bound to the recombinant tri-S, S1 and RBD proteins with high  
165 affinity as measured by surface plasmon resonance (**Figure 4A**). They targeted similar or  
166 spatially-close epitopes on the RBD as shown by their cross-competition for ligand binding by  
167 ELISA (**Figures 4B and S3D**). They efficiently blocked the interaction of tri-S to the soluble  
168 ACE2 ectodomain (**Figure 4C**), suggesting that they recognize the receptor binding motif  
169 (RBM). IC<sub>50</sub> values for SARS-CoV-2 neutralization, determined using the pseudoneutralization  
170 and S-Fuse assays, ranged from 3 to 37 ng/ml and from 0.95 to 11.5 ng/ml, respectively  
171 (**Figure 4D**). The most potent antibody, Cv2.1169, was encoded by V<sub>H</sub>1-58/D<sub>H</sub>2-15/J<sub>H</sub>3 and  
172 V<sub>K</sub>3-20/J<sub>K</sub>1 immunoglobulin gene rearrangements, and exhibited low levels of somatic  
173 mutation (3.1% V<sub>H</sub> and 2.1% V<sub>K</sub> at the amino acid level) (**Table S1**). The potential of the SARS-  
174 CoV-2 neutralizers to bind with low-affinity unrelated ligands (polyreactivity), and to cross-react  
175 with self-antigens was then evaluated in different complementary binding assays (**Figure S4**).  
176 None of the antibodies displayed self-reactivity, while only Cv2.3235 and Cv2.3194 showed  
177 polyreactivity (**Figure S4**). None of the potent neutralizers had ADCC potential, but showed  
178 moderate CDC and robust ADCP activities (**Figures S5A-S5C**). Remarkably, Cv2.1169



179 expressed as IgG1 antibody was one of the strongest ADCP-inducer among all the SARS-CoV-  
180 2 Spike mAbs (top 2%; **Figure S5C; Table S1**).

181

## 182 **Neutralization spectrum of potent SARS-CoV-2 neutralizers**

183 Several SARS-CoV-2 variants of concern (VOCs), *i.e.*, Alpha ( $\alpha$ , B.1.1.7), Beta ( $\beta$ , B.1.351),  
184 Gamma ( $\gamma$ , P.1) and Delta ( $\delta$ , B.1.617.2), and variants of interest (VOIs) have emerged during  
185 the pandemics (WHO, 2022). We next evaluated the cross-reactive potential of the 16 anti-  
186 RBD antibodies against VOCs and VOIs. Binding analyses by flow cytometry showed that 3  
187 out of the 5 potent neutralizers bound to cells expressing the spike proteins from VOCs ( $\alpha$ ,  $\beta$ ,  
188  $\gamma$ ,  $\delta$ ) and VOIs ( $\epsilon$ ,  $\iota$ ,  $\kappa$ ,  $\lambda$ ,  $\mu$ ), while most non-neutralizing antibodies had narrowed cross-  
189 reactivity spectra (**Figure 4E**). Only neutralizers Cv2.1169, Cv2.3194 and Cv2.1353, as well  
190 as a third of the non-neutralizing antibodies, displayed unaltered ELISA binding to RBD  
191 proteins from the VOCs  $\alpha$ ,  $\beta$ ,  $\gamma$ ,  $\delta$  and VOIs  $\kappa$ ,  $\delta^+$  (**Figures 4F, S3E and S3G**). Cv2.1169 and  
192 Cv2.3194 were the sole anti-RBD antibodies uniformly blocking the interaction of the ACE2  
193 ectodomain with RBD proteins from the viral variants tested (**Figure 4F; Table S3**). Three  
194 potent neutralizers encoded by  $V_H3-53/66$  immunoglobulin genes (Cv2.1353, Cv2.5213 and  
195 Cv2.3235), sensitive to the RBD mutations at positions 417 and 501 (Dejnirattisai et al., 2021a;  
196 Wibmer et al., 2021), lost binding and/or blocking activity against SARS-CoV-2 variants  $\alpha$ ,  $\beta$ ,  
197  $\gamma$ ,  $\delta$  (**Figures 4F and S3E-S3H**). Both S-Fuse and pseudo-neutralization assays showed that  
198 Cv2.1169 and Cv2.3194 neutralized SARS-CoV-2 VOCs  $\alpha$ ,  $\beta$ ,  $\gamma$ ,  $\delta$  (**Figures 4G, S5D and**  
199 **S5E**).  $V_H3-53$  gene-expressing antibody Cv2.3194 efficiently bound and neutralized all the  
200 variants, most likely due to the usage of rearranged  $V_k3-20/Jk4$  light chain genes as previously  
201 reported (Dejnirattisai et al., 2021a). Among these cross-neutralizers, Cv2.1169 was the most  
202 potent with  $IC_{50}$  values ranging from 1.5 to 2.7 ng/ml against Wuhan, D614G variant,  $\alpha$ ,  $\beta$ ,  $\gamma$ ,  
203 and  $\delta$  strains in the S-Fuse assay, and from 3.5 to 14 ng/ml against D614G variant,  $\alpha$ ,  $\beta$ ,  $\gamma$ ,  $\delta$   
204 and  $\delta^+$  strains in the pseudoneutralization assay (**Figures 4D, 4G, S5D and S5E; Table S3**).  
205 Cv2.1169 ranked among the strongest cross-neutralizers when compared to the parental  
206 versions of benchmarked antibodies used in clinics or in development (**Figures S6A-S6C**). In

207 addition, we produced a Cv2.1169 IgG homolog (V<sub>H</sub>1-58/D<sub>H</sub>2/J<sub>H</sub>3 and V<sub>κ</sub>3-20/J<sub>κ</sub>1) from a  
208 different convalescent donor based on interindividual clonal convergence analyses (**Figures**  
209 **S7A** and **S7B**), Cv2.5179, which also exhibited a potent and broad SARS-CoV-2 neutralizing  
210 activity (**Figures 4H** and **S6C-S6E**).

211 Immunophenotyping of sorted B cells indicated that Cv2.1169 was originally produced  
212 by a Spike<sup>+</sup>RBD<sup>+</sup> IgA<sup>+</sup> B cell with an activated memory phenotype (CD27<sup>+</sup>CD21<sup>-</sup>), and a  
213 surface-expression of the mucosa-homing integrin β7 (**Figure 2D**). We thus also expressed  
214 Cv2.1169 as monomeric IgA antibody, which showed equivalent binding and neutralization  
215 activities compared to its IgG counterpart (**Figures 4I, 4J** and **S3I**). In contrast, purified J-chain  
216 containing IgA dimers demonstrated a higher neutralizing capacity against the Wuhan strain  
217 (**Figure 4K**), suggesting an enhanced neutralization by binding avidity effects as previously  
218 reported (Barnes et al., 2020a; Rujas et al., 2021). Accordingly, the neutralizing activity of  
219 Cv2.1169 IgA Fab against SARS-CoV-2 was strongly impaired as compared to the bivalent  
220 immunoglobulins (**Figure 4J**).

221 SARS-CoV-2 Omicron variant B.1.1.529 or BA.1 became dominant worldwide in January  
222 2021, followed by Omicron BA.2 in March 2022 (WHO, 2022). Omicron BA.1 contains 15 RBD-  
223 amino acid substitutions, which conferred resistance to numerous potent anti-RBD neutralizers  
224 including those in clinical use (Cameroni et al., 2022; Cao et al., 2022a; Planas et al., 2022).  
225 BA.2 has 7 amino acids differing from BA.1 in the RBD, and is also less sensitive to antibody  
226 neutralization (Bruel et al., 2022). Cv2.1169 and Cv2.3194, but not the other anti-RBD  
227 antibodies, bound well to cell-expressed and soluble BA.1 spike proteins as well as to the BA.1  
228 RBD (**Figure 5A**). Both antibodies blocked BA.1 tri-S binding to ACE2, although less efficiently  
229 than for the Wuhan viral spike (**Figure 5B**). Cv2.1169 and Cv2.3194 also had the highest  
230 binding and spike-ACE2-blocking capacity to BA.1 viral proteins by ELISA as compared to  
231 benchmarked antibodies (**Figures 5C** and **5D**). Cv2.1169 and Cv2.3194, but not Cv2.5179,  
232 neutralized BA.1 in the S-Fuse assay with IC<sub>50</sub> of 253 ng/ml and 24.2 ng/ml, respectively  
233 (**Figure 5E; Table S3**). Thus, Cv2.1169 and Cv2.3194 presented, respectively, a 79- and 2.2-  
234 fold decreased neutralization efficacy on BA.1 omicron as compared to Delta (**Figure 5E**). In

235 contrast, Cv2.1169 and Cv2.3194 showed a slightly stronger RBD-binding against Omicron  
236 BA.2 as compared to BA.1 (**Figure 5D**). Consistently, both antibodies blocked more efficiently  
237 the binding of the RBD BA.2 to soluble ACE2 (**Figure 5F**). Nonetheless, Cv2.1169 and  
238 Cv2.3194 showed comparable neutralizing activities against BA.1 and BA.2 in the S-Fuse  
239 assay (**Figure 5G**). As compared to their monomeric counterpart, dimeric Cv2.1169 IgA  
240 antibodies had enhanced RBD-binding and spike-ACE2 blocking activities to Omicron variants  
241 especially BA.1 (**Figure 5H and 5I**). This translated into an increased neutralizing potency of  
242 Cv2.1169 IgA dimers against BA.1 and BA.2 by a 13- and 20-fold, respectively when  
243 normalized for the number of binding sites (**Figure 5J**).

244

### 245 **Structural characterization of the epitopes**

246 To define the epitopes and neutralization mechanisms of the most potent mAbs, we co-  
247 crystallized the corresponding Fab in complex with the Wuhan RBD. The structures of the  
248 Cv2.3235 Fab/RBD and the Cv2.6264 Fab/RBD complexes were determined to 2.3 Å and 2.8  
249 Å resolution, respectively (**Figure S9; Table S3**). The Cv2.1169 Fab/RBD binary complex did  
250 not crystallize, but the Cv2.1169 IgA Fab/CR3022 IgG1 Fab/RBD ternary complex produced  
251 crystals that allowed us to determine the X-ray structure to 2.9 Å. The electron density maps  
252 for the ternary complex were of poor quality and uninterpretable for the constant domain of  
253 Cv2.1169 Fab, indicating their intrinsic mobility. The Cv2.1169 variable domains and the  
254 paratope/epitope region were however well resolved (**Table S3**). The structure revealed that  
255 Cv2.1169 binds the RBM and straddles the RBD ridge leaning toward the face that is occluded  
256 in the “down” conformation of the RBD on a “closed” spike (**Figure 6A**). This binding mode is  
257 similar to other  $V_H1-58/V_K3-20$ -derived neutralizing antibodies (Dejnirattisai et al., 2021b; Starr  
258 et al., 2021; Tortorici et al., 2020; Wang et al., 2021a), as shown in the superposition of the  
259 RBD complexed with A23-58.1, COVOX-253 and S2E12 mAbs (**Figure S8**). Superposing the  
260 structures of the RBD/Cv2.1169 and RBD/ACE2 complexes showed extensive clashes  
261 between the antibody and the receptor (**Figure 6B**), providing the structural basis for its  
262 neutralization mechanism, and agreeing with its RBD-ACE2 blocking capacity (**Figures 4C,**

263 **4F, S3F and S3H**). Cv2.1169, Cv2.3235 and Cv2.6264 bound differently to the RBD, with  
264 Cv2.1169 having the lowest total buried surface area (BSA) ( $\sim 1400 \text{ \AA}^2$ ,  $\sim 2620 \text{ \AA}^2$  and  $\sim 1610$   
265  $\text{ \AA}^2$ , for Cv2.1169, Cv2.3235 and Cv2.6264, respectively) (**Table S4**), despite being the only  
266 mAb that contacts the RBD with all its CDRs. Cv2.1169 also has the highest heavy chain  
267 contribution to the interaction surface ( $\sim 80\%$  of the paratope's BSA), mainly through the  
268 CDR<sub>H3</sub> (**Table S4**). The Cv2.1169 CDR<sub>H3</sub> (14 amino acid length by Kabat definition) bends at  
269 P99 and at F110, delimiting a tongue-like loop that is stabilized by a disulfide bond between  
270 C101<sup>CDRH3</sup> and C106<sup>CDRH3</sup> (**Figure 6C**). This particular shape allows residues between G103  
271 and F110, which are on one side of the CDR<sub>H3</sub> tongue, to recognize the RBD tip and to form  
272 hydrogen bonds through their main-chain atoms (**Figure 6C; Table S5**). The interface is further  
273 stabilized by polar interactions between the side chains of D108 in the CDR<sub>H3</sub> and Y33 in the  
274 CDR<sub>L1</sub> (**Figure 6C; Table S4**).

275 Cv2.1169 epitope comprises the RBD segments 417-421, 455-458, 473-478 and 484-  
276 493 (**Figures 6A and 6C; Table S5**). Apart from T478, all the mutated RBD residues present  
277 in the SARS-CoV-2 VOCs prior to Omicron are at the rim of the contact area (K417, E484) or  
278 outside (L452, N501) (**Figures 6A and 6C**). Conversely, Cv2.3235 interacts with several  
279 residues mutated in several VOCs, *e.g.*, K417 and N501 (**Figures S9A and S9C**), explaining  
280 its reduced capacity to bind and to neutralize  $\alpha$ ,  $\beta$ ,  $\gamma$  and  $\delta^+$  variants (**Figures 4E, 4F and S5A**).  
281 The RBD residue T478 forms hydrogen bonds with Cv2.1169 heavy and light chains, and is  
282 mutated in the  $\delta$  and  $\delta^+$  variants (T478K) (**Figure 6C; Table S5**). Despite this substitution,  
283 Cv2.1169 is still able to efficiently bind and neutralize both variants (**Figures 4E, 4F, S5A and**  
284 **S5B**). This indicates that the interface integrity does not depend on the hydrogen bonds formed  
285 with the T478 side chain and that there is enough space for the lysine residue to adopt a  
286 rotamer with reduced clashes with the antibody. Unlike the Cv2.6264 antibody, which also  
287 straddles the RBD ridge but lost reactivity against the  $\delta$  and  $\delta^+$  variants (**Figures 4E, S9B and**  
288 **S9D**), Cv2.1169 buries the RBD F486 within a hydrophobic cavity. This pocket is formed by  
289 aromatic residues of the FWR<sub>H2</sub> (W50), the CDR<sub>H3</sub> (F110), the CDR<sub>L1</sub> (Y33) and the CDR<sub>L3</sub>  
290 (Y92 and W97) (**Figure 6D**), and mimics the environment encountered when interacting with

291 ACE2 (Lan et al., 2020). Thus, the F486 residue likely acts as an anchor for Cv2.1169,  
292 strengthening its interaction with the RBM allowing to tolerate the T478K mutation in the  $\delta$  and  
293  $\delta^+$  variants. Four of the Cv2.1169-RBD contacting residues are mutated in BA.1 and BA.2  
294 variants, including the substitution K417N already present in  $\beta$  and  $\gamma$ , and T478K in  $\delta$ , as well  
295 as two Omicron-specific mutations S477N and Q493R (**Tables S5**). Although all of them are  
296 at the periphery of Cv2.1169 binding site (**Figures 6A-6C**), their combination explains the  
297 decreased binding and neutralization of SARS-CoV-2 BA.1 and BA.2 compared to the other  
298 VOCs (**Figure 5**).

299 As afore-mentioned, Cv2.1169 leans towards the RBD's occluded face, making the  
300 epitope inaccessible on the 'down' conformation (**Figure 6E**), which implies that the antibody  
301 binds only to the RBD in its 'up' conformation. This was confirmed by the 2.8Å cryo-EM  
302 reconstruction of the SARS-CoV-2 S<sub>6P</sub> protein trimer in complex with Cv2.1169 IgA Fab (See  
303 **Figure S10** for the cryo-EM processing strategy). The map showed that the spike is in the  
304 open form with each protomer bound by a Cv2.1169 Fab (**Figure 6F**). Considering that  
305 Cv2.1169 blocked SARS-CoV-2 tri-S binding to soluble ACE2 receptor, and that its binding  
306 site is only accessible in the up-RBD conformation, our data suggest that the antibody belongs  
307 to the class 1 category (or Ia) (Barnes et al., 2020b), with an epitope in the RBD-B group (Yuan  
308 et al., 2021). Accordingly, Cv2.1169 cross-competed for binding to spike and RBD proteins  
309 with class 1 benchmarked SARS-CoV-2 neutralizers (CT-P59, COV2-2196, REGN10933, and  
310 CB6), but also moderately with class 2 antibody LY-CoV555 (**Figure S6D**).

311

### 312 ***In vivo* therapeutic activity of Cv2.1169 against SARS-CoV-2 infection**

313 We evaluated the *in vivo* therapeutic potential of neutralizing antibody Cv2.1169 using first the  
314 K18-hACE2 transgenic mouse model for SARS-CoV-2 (Wuhan strain) infection. Mice  
315 intranasally infected with 10<sup>4</sup> PFU of SARS-CoV-2 were treated 6 h later with a single  
316 intraperitoneal (i.p.) injection of Cv2.1169 IgG antibody (0.25 mg, ~10 mg/kg and 0.5 mg, ~20  
317 mg/kg) or control IgG antibody (0.5 mg, ~20 mg/kg) (**Figure 7A**). Infected mice from the control  
318 group lost up to 25% of their body weight within the first 6 days post-infection (dpi) before

319 reaching humane endpoints at 7-8 dpi (**Figure 7A**). In contrast, all animals treated with  
320 Cv2.1169 IgG survived and recovered their initial body weight after experiencing a transient  
321 loss during the first week (**Figure 7A**). Even when infected with a higher viral inoculum ( $10^5$   
322 PFU SARS-CoV-2), and treated 22 h post-infection with Cv2.1169 IgG (~ 40 mg/kg *i.p. plus*  
323 *i.n.*), half of the mice survived compared to those in the control group ( $p=0.029$ ) (**Figure 7B**).  
324 Next, to evaluate the *in vivo* efficacy of Cv2.1169 IgA antibodies, a single low dose of either  
325 Cv2.1169 IgA or IgG antibodies (0.125 mg *i.p.*, ~ 5 mg/kg) was administered to SARS-CoV-2-  
326 infected mice ( $10^4$  PFU challenge dose). Despite a significant and comparable reduction of  
327 viral loads in the oral swabs of Cv2.1169 IgA- and IgG-treated mice compared to control  
328 animals at 4 dpi ( $2.6 \times 10^4$  eqPFU/ml vs  $5.7 \times 10^3$  eqPFU/ml for Cv2.1169 IgA [ $p=0.008$ ], and  
329  $4.7 \times 10^3$  eqPFU/ml for Cv2.1169 IgG [ $p=0.029$ ]) (**Figure S11A**), all mice treated with the SARS-  
330 CoV-2 IgAs were euthanized at 7-8 dpi, whereas 75% of the Cv2-1169 IgG-treated mice lost  
331 weight and developed symptoms but recovered their initial body weight after 2 weeks (**Figure**  
332 **7C**). This can be explained by the rapid decay of circulating human IgA as compared to IgG  
333 antibodies in mice (**Figure S11C**).

334 SARS-CoV-2-related pathogenesis in infected Golden Syrian hamsters resemble mild-  
335 to-moderate COVID-19 disease in humans (Imai et al., 2020; Sia et al., 2020). To further  
336 evaluate the *in vivo* efficacy of Cv2.1169 IgG neutralizer, hamsters infected *i.n.* with  $6.10^4$  PFU  
337 of SARS-CoV-2 were treated 24 h later with a single injection of Cv2.1169 IgG or control  
338 antibodies (1 mg *i.p.*, ~10 mg/kg) (**Figure 7D**). Lung weight to body weight (LW/BW) ratio,  
339 intra-lung viral infectivity and RNA load were measured at 5 dpi. Both pulmonary viral infectivity  
340 and RNA levels in hamsters treated with Cv2.1169 were significantly reduced compared to  
341 control animals ( $2.44 \times 10^3$  vs  $10 \times 10^5$  PFU/lung,  $p=0.0005$  and  $4.3 \times 10^7$  vs  $3.4 \times 10^8$  copies/ $\mu$ g  
342 RNA,  $p=0.013$ , respectively) (**Figure 7D**). We next compared the *in vivo* activity of Cv2.1169  
343 IgG and IgA antibodies at a dose ~5 mg/kg in hamsters 4h post-infection. IgA- and IgG-treated  
344 hamsters showed a reduction in LW/BW ratio compared to control animals (1.64 vs 1.4 for IgA  
345 [ $p=0.03$ ] and 1.32 for IgG [ $p=0.004$ ]) (**Figure 7E**). As expected from the rapid disappearance  
346 of circulating human IgA antibodies in treated animals (**Figure S11E**), the intra-lung viral

347 infectivity and RNA loads were comparable between SARS-CoV-2 neutralizing IgA-treated and  
348 control hamsters (**Figure 7D**). In contrast, the administration of Cv2.1169 IgG antibodies  
349 reduced both SARS-CoV-2 infectivity and RNA levels in the lungs of treated hamsters  
350 ( $1.39 \times 10^6$  vs 80 PFU/lung,  $p=0.0002$ ;  $6.14 \times 10^8$  vs  $1.51 \times 10^8$  copies/ $\mu$ g RNA,  $p=0.028$ ) (**Figure**  
351 **7D**). Cv2.1169 IgA and IgG-treated animals showed similar endogenous anti-spike IgG titers,  
352 which were reduced as compared to the control group ( $p<0.0001$  and  $p=0.0003$ , respectively),  
353 suggesting potential early antiviral effects of Cv2.1169 IgA antibodies against SARS-CoV-2  
354 infection (**Figure S11F**).

355 To determine whether Cv2.1169 is active *in vivo* against infection with SARS-CoV-2  
356 VOCs, we tested the prophylactic activity of Cv2.1169 IgA antibodies and the therapeutic  
357 activity of Cv2.1169 IgG antibodies against SARS-CoV-2 VOC Beta in K18-hACE2 transgenic  
358 mice. A single administration of Cv2.1169 IgA antibodies at  $\sim 10$  mg/kg (0.25 mg *i.p.*) 6h prior  
359 to infection with  $10^4$  PFU of SARS-CoV-2 Beta ( $\beta$ ) protected 87.5% of the animals from death  
360 (**Figure 7F**). Despite the fact that human SARS-CoV-2 IgA antibodies did not persist in the  
361 mouse circulation (**Figure S11C**), Cv2.1169 IgA-treated mice also recovered their initial body  
362 weight during the follow-up (**Figure 7F**). Likewise, treating once SARS-CoV-2 Beta-infected  
363 mice with Cv2.1169 IgG antibodies (0.25 mg *i.p.*,  $\sim 10$  mg/kg) 6h post-infection led to 100%  
364 survival, while all animals receiving the control antibodies were euthanized at 7-8 dpi (**Figure**  
365 **7F**). Of note, human Cv2.1169 IgG antibodies were still detectable in mouse sera at the end  
366 of the follow-up (**Figures S11B** and **S11C**). In addition, mice pre-treated with Cv2.1169 IgAs  
367 developed higher anti-spike IgG antibody titers as compared to those treated with Cv2.1169  
368 IgG antibodies, suggesting a weaker viral control in the former group (**Figure S11D**).

369 **Discussion**

370 SARS-CoV-2 infection triggers the production of high-affinity IgGs and IgAs to the viral spike,  
371 including neutralizing antibodies, released in mucosal secretions and circulating in the blood  
372 (Smith et al., 2021; Sterlin et al., 2021). Class-switched IgG and IgA memory B cells are also  
373 elicited during COVID-19, persist for months post-infection, and can continue to mature and  
374 expand upon antigenic challenges (Gaebler et al., 2021; Sokal et al., 2021; Wang et al.,  
375 2021c). In line with previous reports (Sterlin et al., 2021; Zhou et al., 2021b), we found that  
376 serum IgA antibodies from COVID-19 convalescents neutralize SARS-CoV-2, often more  
377 efficiently than their IgG counterparts despite their lower representativeness in the blood. IgA  
378 neutralizing titers were correlated to anti-S1/-RBD antibody levels and spike<sup>+</sup> memory IgA B-  
379 cell frequencies, suggesting coordinated serological and cellular humoral responses in these  
380 individuals as previously reported (Juno et al., 2020). We also document an association  
381 between spike-reactive resting memory IgG B cells and Th2-like cTfh cells, which likely  
382 encompass spike-specific cTfh2 cells (Juno et al., 2020). In this study, we characterized  
383 SARS-CoV-2 spike-specific IgG<sup>+</sup> and IgA<sup>+</sup> memory B-cell antibodies from COVID-19  
384 convalescent individuals with high seroneutralization titers. Surprisingly, only a minority (~7%)  
385 of the antibodies - all targeting the RBD - efficiently neutralized SARS-CoV-2 *in vitro*. Other  
386 less potent anti-RBD and several anti-NTD antibodies neutralizing SARS-CoV-2 were also  
387 isolated as previously reported (Andreano et al., 2021; Brouwer et al., 2020; Chi et al., 2020;  
388 Liu et al., 2020; Robbiani et al., 2020; Wec et al., 2020; Zost et al., 2020b).

389 Besides neutralization, SARS-CoV-2 IgGs can exert antiviral effector functions  
390 dependent or not on their binding to FcγR (*i.e.*, ADCC/ADCP and CDC, respectively), playing  
391 a role in the therapeutic protection against SARS-CoV-2 infection *in vivo* (Schäfer et al., 2021;  
392 Winkler et al., 2021). Here, we found that despite lacking high neutralization potential, anti-S2  
393 and anti-NTD IgGs harbor strong Fc-dependent effector functions less frequently observed  
394 with anti-RBD antibodies. This tendency suggests a dichotomy of antiviral functions based on  
395 epitope specificity, with antibodies to the spike head (RBD) being neutralizers and those to the  
396 stalk (S2) being effectors, while anti-NTD displayed mixed activities. Of note, one neutralizing



397 antibody termed S2P6 targeting the S2 stem helix peptide also mediates a strong ADCC  
398 activity (Pinto et al., 2021).

399         Among the 102 SARS-CoV-2 antibodies described in this study, Cv2.1169 and Cv2.3194  
400 were the sole potent neutralizers with a sustained activity against all SARS-CoV-2 variants,  
401 including Omicron BA.1 and BA.2 subtypes. Comparably to typical class 1 anti-RBD  
402 antibodies, Cv2.3194 uses  $V_{H3-53}$  variable genes and displays a short CDR<sub>H3</sub> (Yuan et al.,  
403 2020, 2021), but differs from the others by its resistance to escape mutations in the VOCs.  
404 Indeed,  $V_{H3-53}$ -encoded anti-RBD antibodies usually lose their capacity to neutralize SARS-  
405 CoV-2 viruses with mutations in position K417 and N501 including the VOCs  $\alpha$ ,  $\beta$ ,  $\gamma$ , and  $\delta$   
406 (Yuan et al., 2021; Zhou et al., 2021a). A rare mutation in the CDR<sub>K1</sub> of  $V_{K3-20}$ -expressing  
407 class 1 anti-RBD antibodies (P30S) has been proposed to rescue VOC neutralization  
408 (Dejnirattisai et al., 2021a), but is absent in Cv2.3194. As the Cv2.3194 Fab/ RBD complex did  
409 not crystallize, the molecular basis for its unaltered potent cross-neutralizing capacity against  
410 all VOCs remain to be solved. The other potent SARS-CoV-2 cross-neutralizing antibody,  
411 Cv2.1169, is a class 1 neutralizer binding to RBD with a modest total buried surface area.  
412 Except for Omicron BA.1 and BA.2, all mutated RBD residues in the SARS-CoV-2 VOCs had  
413 a negligible impact on the SARS-CoV-2 binding and neutralizing capacity of Cv2.1169.  
414 Based on structural data analysis, we identified the RBM residues in position F486 and N487  
415 as critical for Cv2.1169 binding, acting as anchors that can accommodate the T478K mutation  
416 present in several VOCs. Importantly, as previously shown for  $V_{H1-58}$ -class antibody S2E12,  
417 substitutions in position F486 and N487 are unlikely to occur in potential future VOCs because  
418 of their deleterious effects in reducing RBD-binding to ACE2 and viral replicative fitness  
419 (Greaney et al., 2021; Han et al., 2021). Hence, Cv2.1169 belongs to a class of broad SARS-  
420 CoV-2 neutralizers (*i.e.*, S2E12, A23.58.1, AZD8895 [COV2-2196]) with a high barrier to viral  
421 escape and one of the lowest escapability (Dong et al., 2021; Greaney et al., 2021; Han et al.,  
422 2021; Wang et al., 2021a). Also, the diminished potency of Cv2.1169 against SARS-CoV-2  
423 Omicron appears moderate when compared to other neutralizing antibodies to the RBD “ $V_{H1-}$

424 58 supersite” that drastically reduced or lost their activity against BA.1 and BA.2 (Cameroni et  
425 al., 2022; Cao et al., 2022a; Cao et al., 2022b).

426 SARS-CoV-2 animal models using rodents and non-human primates have been pivotal  
427 in demonstrating the *in vivo* prophylactic and therapeutic capacity of human neutralizing anti-  
428 spike antibodies (Noy-Porat et al., 2021; Rogers et al., 2020; Rosenfeld et al., 2021). We show  
429 that Cv2.1169 IgG efficiently prevents and/or protects animals from infection with SARS-CoV-  
430 2 and its VOC Beta. Cv2.1169 was originally expressed by circulating blood IgA-expressing  
431 activated memory B cells likely developing in mucosal tissues, and we established that  
432 Cv2.1169 IgA antibodies can protect mice from SARS-CoV-2 VOC Beta. Hence, one can  
433 assume that such antibodies if locally present at mucosal surfaces, particularly as dimeric IgAs,  
434 could efficiently neutralize and/or eliminate virions and therefore, potentially diminish the risk  
435 of infection by SARS-CoV-2 variants. In this regard, longer hinge region and multivalency of  
436 IgA1 antibody dimers allow enhancing SARS-CoV-2 neutralization *in vitro* as compared to their  
437 IgG1 counterparts (Sun et al., 2021; Wang et al., 2021b). In line with this, we found that the  
438 loss of neutralization activity of Cv2.1169 against BA.1 and BA.2 was greatly rescued by avidity  
439 effects of the antibody produced in its dimeric IgA form.

440 Several escape mutations in the spike of SARS-CoV-2 variants caused resistance to  
441 antibody neutralization, compromising vaccine and therapeutic antibody efficacy (Cameroni et  
442 al., 2022; Pinto et al., 2021; Planas et al., 2021b, 2021a). Remarkably, Cv2.1169 and  
443 Cv2.3194 demonstrated a broad activity, neutralizing not only VOCs Alpha, Beta, Gamma,  
444 Delta and Delta+ but also BA.1 and BA.2, and ranked as the most potent cross-neutralizer  
445 when compared to benchmarked antibodies used in clinics. Adjunct to its neutralizing activity,  
446 the strong ADCP potential of Cv2.1169 IgG antibodies could contribute to eliminating cell-free  
447 and cell-associated virions and stimulating adaptive immunity *via* vaccinal effects (Corti et al.,  
448 2021). Taking into account healthcare benefits afforded by antibody therapies to fight COVID-  
449 19 (Corti et al., 2021; Singh et al., 2022), and considering the excellent antiviral attributes of  
450 Cv2.1169 and Cv2.3194, these two antibodies represent promising candidates for prophylactic  
451 and/or therapeutic strategies against COVID-19. Long-acting versions of these broadly SARS-

452 CoV-2 neutralizing antibodies with extended half-life could be used to provide protective  
453 immunity in immunocompromised populations (Gentile and Schiano Moriello, 2022).

## 454 **Methods**

### 455 *Human samples*

456 Blood samples from COVID-19 convalescent donors were obtained as part of the CORSER  
457 and REACTing French COVID-19 cohorts in accordance with and after ethical approval from  
458 all the French legislation and regulation authorities. The CORSER study was registered with  
459 ClinicalTrials.gov (NCT04325646), and received ethical approval by the Comité de Protection  
460 des Personnes Ile de France III. The REACTing French Covid-19 study was approved by the  
461 regional investigational review board (IRB; Comité de Protection des Personnes Ile-de-France  
462 VII, Paris, France), and performed according to the European guidelines and the Declaration  
463 of Helsinki. All participants gave written consent to participate in this study, and data were  
464 collected under pseudo-anonymized conditions using subject coding.

### 465 *Serum IgG and IgA purification*

467 All human sera were heat-inactivated at 56°C for 60 min. Human IgG and IgA antibodies were  
468 purified from donors' sera by affinity chromatography using Protein G Sepharose® 4 Fast Flow  
469 (GE Healthcare) and peptide M-coupled agarose beads (Invivogen), respectively. Purified  
470 serum antibodies were dialyzed against PBS using Slide-A-Lyzer® Cassettes (10K MWCO,  
471 Thermo Fisher Scientific).

472

### 473 *Viruses*

474 SARS-CoV-2 BetaCoV/France/IDF0372/2020 (GISAID ID: EPI\_ISL\_406596) and D614G  
475 (hCoV-19/France/GE1973/2020; GISAID ID: EPI\_ISL\_414631) strains were supplied by the  
476 National Reference Centre for Respiratory Viruses (Institut Pasteur, France) (Grzelak et al.,  
477 2020; Planas et al., 2021a).  $\alpha$  (B.1.1.7; GISAID ID: EPI\_ISL\_735391),  $\beta$  (B.1.351; GISAID ID:  
478 EPI\_ISL\_964916),  $\delta$  (B.1.617.2; GISAID ID: EPI\_ISL\_2029113),  $\omicron$  BA.1 (GISAID ID:  
479 EPI\_ISL\_6794907) and BA.2 strains were provided by the Virus and Immunity Unit (Institut  
480 Pasteur) (Planas et al., 2021b, 2021a, 2022; Bruel et al., 2022).  $\gamma$  variant (P.1.; hCoV-  
481 19/Japan/TY7-501/2021; GISAID ID: EPI\_ISL\_833366) was obtained from Global Health  
482 security action group Laboratory Network (Betton et al., 2021). The Beta strain ( $\beta$ , B.1.351;  
483 hCoV-19/France/IDF-IPP00078/2021) used for mouse experiments was supplied by the  
484 National Reference Centre for Respiratory Viruses (Institut Pasteur, France). Hamsters were  
485 infected with the BetaCoV/France/IDF00372/2020 strain (EVAg collection, Ref-SKU: 014V-  
486 03890). Viruses were amplified by one or two passages in Vero E6 cell cultures and titrated.  
487 The sequence of the viral stocks was verified by RNAseq. All work with infectious virus was  
488 performed in biosafety level 3 containment laboratories at Institut Pasteur.

489

### 490 *Expression and purification of viral proteins*

491 Codon-optimized nucleotide fragments encoding stabilized versions of SARS-CoV-2, SARS-  
492 CoV-1, MERS-CoV, OC43-CoV, HKU1-CoV, 229E-CoV, NL63-CoV (2P) and BA.1 spike  
493 (HexaPro) (S) ectodomains, and SARS-CoV-2 S2 domain, followed by a foldon trimerization  
494 motif and C-terminal tags (Hisx8-tag, Strep-tag, and AviTag) were synthesized and cloned into  
495 pcDNA3.1/Zeo(+) expression vector (Thermo Fisher Scientific). For competition ELISA  
496 experiments, a SARS-CoV-2 S ectodomain DNA sequence without the StrepTag was also  
497 cloned into pcDNA3.1/Zeo(+) vector. Synthetic nucleotide fragments coding for Wuhan SARS-  
498 CoV-2 RBD, S1 subunit, S1 N-terminal domain (NTD), S1 connecting domain (CD),  
499 nucleocapsid protein (N), BA.1 and BA.2 RBDs followed by C-terminal tags (Hisx8-tag, Strep-  
500 tag, and AviTag), as well as human angiotensin-converting enzyme 2 (ACE2) (*plus* Hisx8- and  
501 Strep-tags), were cloned into pcDNA3.1/Zeo(+) vector. For SARS-CoV-2 RBD variant proteins,  
502 mutations (N501Y for the  $\alpha$  variant; K417N, E484K and N501Y for the  $\beta$  variant; K471T, E484K  
503 and N501Y for the  $\gamma$  variant; L452R and T478K for the  $\delta$  variant, K417N, L452R and T478K  
504 for the  $\delta$ + variant; L452R and E484Q for the  $\kappa$  variant) were introduced using the QuickChange  
505 Site-Directed Mutagenesis kit (Agilent Technologies) following the manufacturer's instructions.  
506 Glycoproteins were produced by transient transfection of exponentially growing Freestyle 293-  
507 F suspension cells (Thermo Fisher Scientific, Waltham, MA) using polyethylenimine (PEI)  
508 precipitation method as previously described (Lorin and Mouquet, 2015). Proteins were

509 purified from culture supernatants by high-performance chromatography using the Ni  
510 Sepharose® Excel Resin according to manufacturer's instructions (GE Healthcare), dialyzed  
511 against PBS using Slide-A-Lyzer® dialysis cassettes (Thermo Fisher Scientific), quantified  
512 using NanoDrop 2000 instrument (Thermo Fisher Scientific), and controlled for purity by SDS-  
513 PAGE using NuPAGE 3-8% Tris-acetate gels (Life Technologies), as previously described  
514 (Lorin and Mouquet, 2015). AviTagged tri-S and RBD proteins were biotinylated using BirA  
515 biotin-protein ligase bulk reaction kit (Avidity, LLC) or Enzymatic Protein Biotinylation Kit  
516 (Sigma-Aldrich). SARS-CoV-2 RBD protein was also coupled to DyLight 650 using the  
517 DyLight® Amine-Reactive Dyes kit (Thermo Fisher scientific).

518 For crystallographic experiments, a codon-optimized nucleotide fragment encoding the  
519 SARS-CoV-2 RBD protein (residues 331-528), followed by an enterokinase cleavage site and  
520 a C-terminal double strep-tag was cloned into a modified pMT/BiP expression vector (pT350,  
521 Invitrogen). Drosophila S2 cells were stably co-transfected with pT350 and pCoPuro (for  
522 puromycin selection) plasmids. The cell line was selected and maintained in serum-free insect  
523 cell medium (HyClone, Cytiva) supplemented with 7 µg/ml puromycin and 1%  
524 penicillin/streptomycin antibiotics. Cells were grown to reach a density of  $1 \times 10^7$  cells/ml, and  
525 protein expression was then induced with 4 µM CdCl<sub>2</sub>. After 6 days of culture, the supernatant  
526 was collected, concentrated and proteins were purified by high-performance chromatography  
527 using a Streptactin column (IBA). The eluate was buffer-exchanged into 10 mM Tris-HCl (pH  
528 8.0), 100 mM NaCl, 2 mM CaCl<sub>2</sub> using a HiPrep 26/10 Desalting column (GE Healthcare) and  
529 subsequently treated with enterokinase overnight at room temperature to remove the strep-  
530 tag. Undigested tagged proteins were removed using a Streptactin column, and monomeric  
531 untagged protein was purified by size-exclusion chromatography (SEC) using a Superdex 75  
532 column (Cytiva) equilibrated with 10 mM Tris-HCl (pH 8.0), 100 mM NaCl. Purified monomeric  
533 untagged protein was concentrated and stored at -80 °C until used.

534 For Cryo-EM experiments, a codon-optimized nucleotide fragment encoding the SARS-  
535 CoV-2 spike (S) protein (residues 1-1208) was cloned with its endogenous signal peptide in  
536 pcDNA3.1(+) vector, and expressed as a stabilized trimeric prefusion construct with six proline  
537 substitutions (F817P, A892P, A899P, A942P, K986P, V987P), along with a GSAS substitution  
538 at the furin cleavage site (residues 682–685), followed by a Foldon trimerization motif (Hsieh  
539 et al., 2020), and C-terminal tags (Hisx8-tag, Strep-tag and AviTag). The recombinant protein,  
540 S\_6P, was produced by transient transfection of Expi293F™ cells (Thermo Fisher Scientific,  
541 Waltham, MA) using FectroPRO® DNA transfection reagent (Polyplus), according to the  
542 manufacturer's instructions. After 5 days of culture, recombinant proteins were purified from  
543 the concentrated supernatant by affinity chromatography using a SrepTactin column (IBA),  
544 followed by a SEC using a Superose 6 10/300 column (Cytiva) equilibrated in 10 mM Tris-HCl,  
545 100 mM NaCl (pH 8.0). The peak corresponding to the trimeric protein was concentrated and  
546 stored at -80 °C until used.

547

#### 548 *Flow cytometry immunophenotyping*

549 Peripheral blood mononuclear cells (PBMC) were isolated from donors' blood using Ficoll  
550 Plaque Plus (GE Healthcare). Human blood B cells and circulating T follicular helper T cells  
551 (cTfh) were analyzed using two different fluorescently-labeled antibody cocktails. For B-cell  
552 phenotyping, B cells were first isolated from donors' PBMC by MACS using human CD19  
553 MicroBeads (Miltenyi Biotec). CD19<sup>+</sup> B cells were then stained using LIVE/DEAD aqua fixable  
554 dead cell stain kit (Molecular Probes, Thermo Fisher Scientific) to exclude dead cells. B cells  
555 were incubated for 30 min at 4°C with biotinylated tri-S and DyLight 650-coupled RBD, washed  
556 once with 1% FBS-PBS (FACS buffer), and incubated for 30 min at 4°C with a cocktail of  
557 mouse anti-human antibodies: CD19 Alexa 700 (HIB19, BD Biosciences, San Jose, CA), CD21  
558 BV421 (B-ly4, BD Biosciences), CD27 PE-CF594 (M-T271, BD Biosciences), IgG BV786  
559 (G18-145, BD Biosciences), IgA FITC (IS11-8E10, Miltenyi Biotec, Bergisch Gladbach,  
560 Germany), Integrin β7 BUV395 (FIB504, BD Biosciences) and streptavidin R-PE conjugate  
561 (Invitrogen, Thermo Fisher Scientific). Cells were then washed and resuspended in FACS  
562 buffer. Following a lymphocyte and single cell gating, live cells were gated on CD19<sup>+</sup> B cells.  
563 FACS analyses were performed using a FACS Aria Fusion Cell Sorter (Becton Dickinson,

564 Franklin Lakes, NJ) and FlowJo software (v10.3, FlowJo LLC, Ashland, OR).  
565 Immunophenotyping of cTfh subsets was performed on negative fractions from the CD19  
566 MACS. The cTfh antibody panel included: CD3 BV605 (SK7), CD4 PE-CF594 (RPA-T4),  
567 CD185/CXCR5 AF-488 (RF8B2), CD183/CXCR3 PE-Cy<sup>TM</sup>5 (1C6/CXCR3), CD196/CCR6 PE-  
568 Cy<sup>TM</sup>7 (11A9), CD197/CCR7 AF647 (3D12) (BD Biosciences), CD279/PD1 BV421  
569 (EH12.2H7, BioLegend), and CD278/ICOS PE (ISA-3, Thermo Fisher Scientific). Cells were  
570 stained as described above, washed and fixed in 1% paraformaldehyde-PBS. Following a  
571 lymphocyte and single cell gating, dead cells were excluded. Flow cytometric analyses of  
572 stained cells were performed using a BD LSR Fortessa<sup>TM</sup> instrument (BD Biosciences), and  
573 the FlowJo software (v10.6, FlowJo LLC).

#### 574 *Single B-cell FACS sorting and expression-cloning of antibodies*

575 Peripheral blood human B cells were isolated and stained as describe above. Single SARS-  
576 CoV-2 S<sup>+</sup> IgG<sup>+</sup> and IgA<sup>+</sup> B cells were sorted into 96-well PCR plates using a FACS Aria Fusion  
577 Cell Sorter (Becton Dickinson, Franklin Lakes, NJ) as previously described (Tiller et al., 2008).  
578 Single-cell cDNA synthesis using SuperScript IV reverse transcriptase (Thermo Fisher  
579 Scientific) followed by nested-PCR amplifications of IgH, Igk and Igλ genes, and sequences  
580 analyses for Ig gene features were performed as previously described (Prigent et al., 2016;  
581 Tiller et al., 2008). Purified digested PCR products were cloned into human Igy1-, Igk- or Igλ-  
582 expressing vectors (GenBank# LT615368.1, LT615369.1 and LT615370.1, respectively) as  
583 previously described (Tiller et al., 2008). Cv2.1169 were also cloned into human Igy1<sup>NA</sup>,  
584 Igy1<sup>LALA</sup> [N297A and L234A/L235A mutations introduced by Site-Directed Mutagenesis  
585 (QuickChange, Agilent Technologies)], Igα1 and Fab-Igα1-expressing vectors (Lorin and  
586 Mouquet, 2015; Lorin et al., 2022). Cv2.3235, and Cv2.6264 IgH were also cloned into a  
587 human Fab-Igy1-expressing vector (Mouquet et al., 2012). Recombinant antibodies were  
588 produced by transient co-transfection of Freestyle<sup>TM</sup> 293-F suspension cells (Thermo Fisher  
589 Scientific) using PEI-precipitation method as previously described (Lorin and Mouquet, 2015).  
590 The dimeric form of Cv2.1169 IgA1 was produced by co-transfection of Freestyle<sup>TM</sup> 293-F cells  
591 with a human J chain pcDNA<sup>TM</sup>3.1/Zeo(+) vector as previously described (Lorin and Mouquet,  
592 2015). Recombinant human IgG, IgA antibodies and Fab were purified by affinity  
593 chromatography using Protein G Sepharose® 4 Fast Flow (GE Healthcare), peptide M-  
594 coupled agarose beads (Invivogen) and Ni Sepharose® Excel Resin (GE Healthcare),  
595 respectively. Monomeric and dimeric Cv2.1169 IgA1 antibodies were separated by SEC using  
596 a Superose 6 Increase 10/300 column (Cytiva). After equilibration of the column with PBS,  
597 purified IgA antibodies were injected into the column at a flow rate of 0.3 ml/min. Monomers,  
598 dimers and multimers were separated upon an isocratic elution with 1.2 CV of PBS. The  
599 quality/purity of the different purified fractions was evaluated by SDS-PAGE using 3–8% Tris–  
600 Acetate gels (Life Technologies) under non-reducing conditions followed by silver staining  
601 (Silver Stain kit, Thermo Scientific). Purified antibodies were dialyzed against PBS. The  
602 purified parental IgG1 antibody versions of benchmarked mAbs [REGN10933, REGN10987  
603 (Hansen et al., 2020), CB6 (Shi et al., 2020), LY-CoV555 (Jones et al., 2021), CT-P59 (Kim et  
604 al., 2021), COV2-2196, COV2-2130 (Zost et al., 2020b), ADG-2 (Garrett Rappazzo et al.,  
605 2021) and S309 (Pinto et al., 2020)] were prepared as described above after cloning of  
606 synthetic DNA fragments (GeneArt, Thermo Fisher Scientific) coding for the immunoglobulin  
607 variable domains. Antibody preparations for *in vivo* infusions were micro-filtered (Ultrafree®-  
608 CL devices - 0.1 μm PVDF membrane, Merck-Millipore, Darmstadt, Germany), and checked  
609 for endotoxins levels using the ToxinSensor<sup>TM</sup> Chromogenic LAL Endotoxin Assay Kit  
610 (GenScript).

#### 611 *ELISAs*

612  
613 ELISAs were performed as previously described (Mouquet et al., 2011, 2012). Briefly, high-  
614 binding 96-well ELISA plates (Costar, Corning) were coated overnight with 250 ng/well of  
615 purified recombinant Coronavirus proteins and 500 ng/well of a SARS-CoV-2 fusion sequence-  
616 containing peptide (KRSFIEDLLFNKVTLDAGFIK, GenScript Biotech). After washings with  
617 0.05% Tween 20-PBS (washing buffer), plates were blocked 2 h with 2% BSA, 1 mM EDTA,  
618

619 0.05% Tween 20-PBS (Blocking buffer), washed, and incubated with serially diluted human  
620 and rodent sera, purified serum IgA/IgG or recombinant mAbs in PBS. Total sera were diluted  
621 1:100 (for humans and golden hamsters) or 1:10 (for K18-hACE2 mice) following by 7  
622 consecutive 1:4 dilutions in PBS. Purified serum IgG and IgA antibodies were tested at 50  
623  $\mu\text{g/ml}$  and 7 consecutive 1:3 dilutions in PBS. Recombinant IgG1 mAbs were tested at 4 or 10  
624  $\mu\text{g/ml}$ , and 4 to 7 consecutive 1:4 dilutions in PBS. Comparative ELISA binding of Cv2.1169  
625 IgG1 and IgA1 antibodies was performed at a concentration of 70 nM, and 7 consecutive  
626 dilutions in PBS. To quantify blood-circulating human Cv2.1169 IgA1 and IgG1 in treated K18-  
627 hACE2 mice and golden hamsters, high-binding 96-well ELISA plates (Costar, Corning) were  
628 coated overnight with 250 ng/well of purified goat anti-human IgA or IgG antibody (Jackson  
629 ImmunoResearch, 0.8  $\mu\text{g/ml}$  final). After washings, plates were blocked, washed, and  
630 incubated for 2 h with 1:100 diluted sera from K18-hACE2 mice and golden hamster and seven  
631 consecutive 1:3 dilutions in PBS. Cv2.1169 IgA1 or IgG1 antibody at 12  $\mu\text{g/ml}$  and seven  
632 consecutive 1:3 dilutions in PBS were used as standards. After washings, the plates were  
633 revealed by incubation for 1 h with goat HRP-conjugated anti-mice IgG, anti-golden hamster  
634 IgG, anti-human IgG or anti-human IgA antibodies (Jackson ImmunoResearch, 0.8  $\mu\text{g/ml}$  final)  
635 and by adding 100  $\mu\text{l}$  of HRP chromogenic substrate (ABTS solution, Euromedex) after  
636 washing steps. Optical densities were measured at 405nm ( $\text{OD}_{405\text{nm}}$ ), and background values  
637 given by incubation of PBS alone in coated wells were subtracted. Experiments were  
638 performed using HydroSpeed™ microplate washer and Sunrise™ microplate absorbance  
639 reader (Tecan Männedorf, Switzerland). For peptide-ELISA, binding of SARS-CoV2 and  
640 control IgG antibodies (at 1  $\mu\text{g/ml}$ ) to 15-mer S2 overlapping 5-amino acid peptides (n=52,  
641 GenScript Biotech, 500 ng/well) was tested using the same procedure as previously described  
642 (Wardemann, 2003). For competition ELISAs, 250 ng/well of StrepTag-free tri-S and RBD  
643 proteins were coated on ELISA plates (Costar, Corning), which were then blocked, washed,  
644 and incubated for 2 h with biotinylated antibodies (at a concentration of 100 ng/ml for tri-S  
645 competition and 25 ng/ml for RBD competition) in 1:2 serially diluted solutions of antibody  
646 competitors in PBS (IgG concentration ranging from 0.39 to 50  $\mu\text{g/ml}$ ). Plates were developed  
647 using HRP-conjugated streptavidin (BD Biosciences) as described above. For the competition  
648 experiments of tri-S- and RBD-binding to ACE2, ELISA plates (Costar, Corning) were coated  
649 overnight with 250 ng/well of purified ACE2 ectodomain. After washings, plates were blocked  
650 2 h with Blocking buffer, PBST-washed, and incubated with recombinant IgG1 mAbs at 2  $\mu\text{g/ml}$   
651 and 7 consecutive 1:2 dilutions in presence of biotinylated tri-S protein at 1  $\mu\text{g/ml}$  in PBS, and  
652 at 10 or 100  $\mu\text{g/ml}$  and 7 consecutive 1:2 dilutions in PBS in presence of biotinylated RBD at  
653 0.5  $\mu\text{g/ml}$ . After washings, the plates were revealed by incubation for 30 min with streptavidin  
654 HRP-conjugated (BD Biosciences) as described above.

655 Polyreactivity ELISA was performed as previously described (Planchais et al., 2019).  
656 Briefly, high-binding 96-well ELISA plates were coated overnight with 500 ng/well of purified  
657 double stranded (ds)-DNA, KLH, LPS, Lysozyme, Thyroglobulin, Peptidoglycan from *B.*  
658 *subtilis*, 250 ng/well of insulin (Sigma-Aldrich, Saint-Louis, MO), flagellin from *B. subtilis*  
659 (Invivogen), MAPK14 (Planchais et al., 2019), and 125 ng/well of YU2 HIV-1 Env gp140 protein  
660 in PBS. After blocking and washing steps, recombinant IgG mAbs were tested at 4  $\mu\text{g/ml}$  and  
661 7 consecutive 1:4 dilutions in PBS. Control antibodies, mGO53 (negative) (Wardemann, 2003),  
662 and ED38 (high positive) (Meffre et al., 2004) were included in each experiment. ELISA binding  
663 was developed as described above.

664 Serum levels of human IL6, IP10, CXCL13 and BAFF were measured using DuoSet  
665 ELISA kits (R&D Systems) with undiluted plasma samples.

666

#### 667 *Flow cytometry binding assays*

668 SARS-CoV-2 specificity validation of cloned human IgG antibodies was performed using the  
669 S-Flow assay as previously described (Grzelak et al., 2020). To evaluate spike cross-reactivity,  
670 Freestyle™ 293-F were transfected with pUNO1-Spike-dfur expression vectors (Spike and  
671 SpikeV1 to V11 plasmids, Invivogen) (1.2  $\mu\text{g}$  plasmid DNA *per*  $10^6$  cells) using PEI-  
672 precipitation method. Forty-eight hours post-transfection,  $0.5 \times 10^6$  transfected and non-  
673 transfected control cells were incubated with IgG antibodies for 30 min at 4°C (1  $\mu\text{g/ml}$ ). After

674 washings, cells were incubated 20 min at 4°C with AF647-conjugated goat anti-human IgG  
675 antibodies (1:1000 dilution; Thermo Fisher Scientific) and LIVE/DEAD Fixable Viability dye  
676 Aqua (1:1000 dilution; Thermo Fisher Scientific), washed and resuspended in PBS-  
677 Paraformaldehyde 1% (Electron Microscopy Sciences). Data were acquired using a CytoFLEX  
678 flow cytometer (Beckman Coulter), and analyzed using FlowJo software (v10.7.1; FlowJo  
679 LLC). Antibodies were tested in duplicate.

680

#### 681 *HEp-2 IFA assay*

682 Recombinant SARS-CoV-2 S-specific and control IgG antibodies (mGO53 and ED38) at 100  
683 µg/ml were analyzed by indirect immuno-fluorescence assay (IFA) on HEp-2 cells sections  
684 (ANA HEp-2 AeskuSlides®, Aesku.Diagnostics, Wendelsheim, Germany) using the kit's  
685 controls and FITC-conjugated anti-human IgG antibodies as the tracer according to the  
686 manufacturer' instructions. HEp-2 sections were examined using the fluorescence microscope  
687 Axio Imager 2 (Zeiss, Jena, Germany), and pictures were taken at magnification x 40 with  
688 5000 ms-acquisition using ZEN imaging software (Zen 2.0 blue version, Zeiss) at the  
689 Imagopole platform (Institut Pasteur).

690

#### 691 *Infrared immunoblotting*

692 Recombinant tri-S protein was heat-denatured at 100°C for 3 min in loading buffer (Invitrogen)  
693 containing 1X sample reducing agent (Invitrogen). Denatured tri-S protein (50 µg total) was  
694 separated by SDS-PAGE with a NuPAGE® 4-12% Bis-Tris Gel (1-well, Invitrogen), electro-  
695 transferred onto nitrocellulose membranes, and saturated in PBS-0.05% Tween 20 (PBST)-  
696 5% dry milk overnight at 4°C. Membranes were inserted into a Miniblot apparatus (Immuntics)  
697 and then incubated with human mAbs (at a concentration of 1 µg/ml) and mouse anti-Hisx6  
698 antibody (1 µg/ml, BD Biosciences) in PBS-T 5% dry milk in each channel for 2 h. For dot  
699 blotting experiments, denatured tri-S (ranging from 0.125 to 2 µg) was immobilized on dry  
700 nitrocellulose membranes for 2 h at room temperature and saturated in PBS-0.05% Tween 20  
701 (PBST)-5% dry milk overnight at 4°C. The membranes were then incubated with human mAbs  
702 (at a concentration of 1 µg/ml) and mouse anti-Hisx6 antibody (1 µg/ml, BD Biosciences) in  
703 PBS-T 5% dry milk for 2 h. After washing with PBST, membranes were incubated for 1h with  
704 1/25,000-diluted Alexa Fluor 680-conjugated donkey anti-human IgG (Jackson  
705 ImmunoResearch) and 1/25,000-diluted IR Dye® 800CW-conjugated goat anti-mouse IgG (LI-  
706 COR Biosciences) in PBST-5% dry milk. Finally, membranes were washed, and examined  
707 with the Odyssey Infrared Imaging system (LI-COR Biosciences).

708

#### 709 *Protein microarray binding analyses*

710 All experiments were performed at 4°C using ProtoArray Human Protein Microarrays (Thermo  
711 Fisher Scientific). Microarrays were blocked for 1 h in blocking solution (Thermo Fisher),  
712 washed and incubated for 1h30 with IgG antibodies at 2.5 µg/ml as previously described  
713 (Grzelak et al., 2020). After washings, arrays were incubated for 1h30 with AF647-conjugated  
714 goat anti-human IgG antibodies (at 1 µg/ml in PBS; Thermo Fisher Scientific), and revealed  
715 using GenePix 4000B microarray scanner (Molecular Devices) and GenePix Pro 6.0 software  
716 (Molecular Devices) as previously described (Planchais et al., 2019). Fluorescence intensities  
717 were quantified using Spotxel® software (SICASYS Software GmbH, Germany), and mean  
718 fluorescence intensity (MFI) signals for each antibody (from duplicate protein spots) was  
719 plotted against the reference antibody mGO53 (non-polyreactive isotype control) using  
720 GraphPad Prism software (v8.1.2, GraphPad Prism Inc.). For each antibody, Z-scores were  
721 calculated using ProtoArray® Prospector software (v5.2.3, Thermo Fisher Scientific), and  
722 deviation ( $\sigma$ ) to the diagonal, and polyreactivity index (PI) values were calculated as previously  
723 described (Planchais et al., 2019). Antibodies were defined as polyreactive when  $PI > 0.21$ .

724

#### 725 *Surface plasmon resonance*

726 Surface plasmon resonance (SPR)-based technology (Biacore 2000, Biacore, Uppsala,  
727 Sweden) was used to assess kinetics of interaction of mAbs with SARS CoV2 proteins – trimer  
728 S, S1 and RBD. Antibodies (Cv2.1169, Cv2.1353, Cv2.3194, Cv2.3235 and Cv2.5213) and



729 ACE2 ectodomain were covalently coupled to CM5 sensor chips (Biacore) using amino-  
730 coupling kit (Biacore) according to the manufacturer's procedure. In brief, IgG antibodies and  
731 ACE2 protein were diluted in 5 mM maleic acid solution, pH 4 to a final concentration of 10  
732 µg/ml and injected over sensor surfaces pre-activated by a mixture of 1-Ethyl-3-(3-  
733 dimethylaminopropyl) carbodiimide and N-hydroxysuccinimide. Uncoupled carboxyl groups  
734 were blocked by exposure to 1M solution of ethanolamine.HCl (Biacore). Immobilization  
735 densities were 500 RU and 1000 RU for IgG antibodies and ACE2, respectively. All analyses  
736 were performed using HBS-EP buffer (10 mM HEPES pH 7.2; 150 mM NaCl; 3 mM EDTA,  
737 and 0.005 % Tween 20). The flow rate of buffer during all real-time interaction measurements  
738 was set at 30 µl/min. All interactions were performed at temperature of 25 °C. SARS CoV-2  
739 tri-S and S1 proteins were serially diluted (two-fold step) in HBS-EP in the range of 40 – 0.156  
740 nM. Same range of concentrations was used for RBD with exception of low affinity interactions  
741 where the concentration range 1280 – 10 nM was applied. The association and dissociation  
742 phases of the binding of viral proteins to the immobilized antibodies and ACE2 were monitored  
743 for 3 and 4 minutes, respectively. The binding of the proteins to reference channel containing  
744 carboxymethylated dextran only was used as negative control and was subtracted from the  
745 binding during data processing. The sensor chip surfaces were regenerated by 30 s exposure  
746 to 4M solution of guanidine-HCl (Sigma-Aldrich). The evaluation kinetic parameters of the  
747 studied interactions were performed by using BIAevaluation version 4.1.1 Software (Biacore).

748

#### 749 *SARS-CoV-2 S-Fuse neutralization assay*

750 S-Fuse cells (U2OS-ACE2 GFP1-10 or GFP 11 cells) were mixed (ratio 1:1) and plated at a  
751 density of  $8 \times 10^3$  per well in a µClear 96-well plate (Greiner Bio-One) as previously described  
752 (Buchrieser et al., 2020). SARS-CoV-2 and VOC viruses (MOI 0.1) were incubated with  
753 recombinant IgG1, monomeric and dimeric IgA1 mAbs at 35 nM or 7 nM, and 11 consecutive  
754 1:4 dilutions in culture medium for 30 min at room temperature and added to S-Fuse cells. The  
755 cells were fixed, 18 h later, in 2% paraformaldehyde, washed and stained with Hoechst stain  
756 (dilution 1:1000; Invitrogen). Images were acquired with an Opera Phenix high-content  
757 confocal microscope (Perkin Elmer). The area displaying GFP expression and the number of  
758 nuclei were quantified with Harmony software 4.8 (Perkin Elmer). The percentage  
759 neutralization was calculated from the GFP-positive area as follows:  $100 \times (1 - (\text{value with IgA/IgG} - \text{value in "non-infected"}) / (\text{value in "no IgA/IgG"} - \text{value in "non-infected"}))$ . IC<sub>50</sub> values  
760 were calculated using Prism software (v.9.3.1, GraphPad Prism Inc.) by fitting replicate values  
761 using the four-parameters dose-response model (variable slope).

762

#### 763 *In vitro SARS-CoV-2 pseudoneutralization assay*

764 The SARS-CoV-2 pseudoneutralization assay was performed as previously described (Anna  
765 et al., 2021; Grzelak et al., 2020). Briefly,  $2 \times 10^4$  293T-ACE2-TMPRSS2 were plated in 96-well  
766 plates. Purified serum IgA and IgG antibodies were tested at 250 µg/ml and 7 consecutive 1:2  
767 dilutions in PBS (or in Penicillin/Streptomycin-containing 10%-FCS DMEM), and incubated  
768 with spike-pseudotyped lentiviral particles for 15-30 minutes at room temperature before  
769 addition to the cells. Recombinant IgG1, IgA1 or Fab-IgA mAbs were also tested at 70 or 350  
770 nM, and 11 consecutive 1:3 dilutions in PBS. After a 48h incubation at 37°C in 5% CO<sub>2</sub>, the  
771 revelation was performed using the ONE-Glo™ Luciferase Assay System (Promega), and the  
772 luciferase signal was measured with EnSpire® Multimode Plate Reader (PerkinElmer). The  
773 percentage of neutralization was calculated as follow:  $100 \times (1 - \text{mean (luciferase signal in sample duplicate)} / \text{mean (luciferase signal in virus alone)})$ . Individual experiments were  
774 standardized using Cv2.3235 antibody. IC<sub>50</sub> values were calculated as described above.

775

#### 776 *Antibody-dependent cellular phagocytosis (ADCP) assay*

777 PBMC were isolated from healthy donors' blood (Etablissement Français du Sang) using Ficoll  
778 Plaque Plus (GE Healthcare). Primary human monocytes were purified from PBMC by MACS  
779 using Whole Blood CD14 MicroBeads (Miltenyi Biotec). Biotinylated-SARS-CoV-2 tri-S  
780 proteins were mixed with FITC-labelled NeutrAvidin beads (1 µm, Thermo Fisher Scientific) (1  
781 µg of tri-S for 1 µl of beads), and incubated for 30 min at room temperature. After PBS  
782

783

784 washings, tri-S coupled-beads 1:500-diluted in DMEM were incubated for 1 h at 37°C with  
785 human IgG1 mAbs (at 3 µg/ml). tri-S-beads-antibody mixtures were then incubated with  $7.5 \times 10^4$   
786 human monocytes for 2 h at 37°C. Following washings with 0.5% BSA, 2 mM EDTA-PBS,  
787 cells were fixed with 4% PFA-PBS and analyzed using a CytoFLEX flow cytometer (Beckman  
788 Coulter). ADCP assays were performed in two independent experiments, and analyzed using  
789 the FlowJo software (v10.6, FlowJo LLC). Phagocytic scores were calculated by dividing the  
790 fluorescence signals (% FITC-positive cells x geometric MFI FITC-positive cells) given by anti-  
791 SARS-CoV-2 spike antibodies by the one of the negative control antibody mGO53.

792

#### 793 *Antibody-dependent cellular cytotoxicity (ADCC) assay*

794 The ADCC activity of anti-SARS-CoV2 S IgG antibodies was determined using the ADCC  
795 Reporter Bioassay (Promega) as previously described (Dufloo et al., 2021). Briefly,  $5 \times 10^4$  Raji-  
796 Spike cells were co-cultured with  $5 \times 10^4$  Jurkat-CD16-NFAT-rLuc cells in presence or absence  
797 of SARS-CoV2 S-specific or control mGO53 IgG antibody at 10 µg/ml or 50 µg/ml and 10  
798 consecutive 1:2 dilutions in PBS. Luciferase was measured after 18 h of incubation using an  
799 EnSpire plate reader (PerkinElmer). ADCC was measured as the fold induction of Luciferase  
800 activity compared to the control antibody. Experiments were performed in duplicate in two  
801 independent experiments.

802

#### 803 *Complement-dependent cytotoxicity (CDC) assay*

804 The CDC activity of anti-SARS-CoV2 S IgG antibodies was measured using SARS-CoV-2  
805 Spike-expressing Raji cells as previously described (Pelleau et al., 2020). Briefly,  $5 \times 10^4$  Raji-  
806 Spike cells were cultivated in the presence of 50% normal or heat-inactivated human serum,  
807 and with or without IgG antibodies (at 10 µg/ml or 50 µg/ml and 10 consecutive 1:2 dilutions in  
808 PBS). After 24h, cells were washed with PBS, and incubated for 30 min at 4°C the live/dead  
809 fixable aqua dead cell marker (1:1,000 in PBS; Life Technologies) before fixation. Data were  
810 acquired on an Attune NxT instrument (Life Technologies). CDC was calculated using the  
811 following formula:  $100 \times (\% \text{ of dead cells with serum} - \% \text{ of dead cells without serum}) / (100$   
812  $- \% \text{ of dead cells without serum})$ . Experiments were performed in duplicate in two independent  
813 experiments.

814

#### 815 *Crystallization and structure determinations*

816 The Fab of anti-SARS-CoV-2 S antibody CR3022 (Ter Meulen et al., 2006), served as a  
817 crystallization chaperone molecule, and was produced and purified as described above  
818 (section with heading *Single B-cell FACS sorting and expression-cloning of antibodies*) (Koide,  
819 2009). The purified RBD protein was incubated overnight at 4 °C with the Fabs with an RBD-  
820 Fab molar ratio of 2:1 (2:1:1 for the ternary complex RBD-Cv2.1169-CR3022). Each binding  
821 reaction was loaded onto a Superdex200 column (Cytiva) equilibrated in 10 mM Tris-HCl (pH  
822 8.0), 100 mM NaCl. The fractions corresponding to the complexes were pooled, concentrated  
823 to 9-10 mg/ml and used in crystallization trials at 18 °C using the sitting-drop vapor diffusion  
824 method. The RBD-Cv2.2325 Fab complex crystalized with 0.1 M ammonium citrate (pH 7.0),  
825 12% PEG 3350, while crystals for RBD-Cv2.6264 Fab were obtained with 0.1 M NaAc, 7%  
826 PEG 6000, 30% ethanol. The RBD-Cv2.1169-CR3022 crystals grew in the presence of 6%  
827 PEG 8000, 0.5 M Li<sub>2</sub>SO<sub>4</sub>. Crystals were flash-frozen by immersion into a cryo-protectant  
828 containing the crystallization solution supplemented with 30% (v/v) glycerol (RBD-Cv2.2325;  
829 RBD-Cv2.1169-CR3022) or 30% (v/v) ethylenglycol (RBD-Cv2.6264), followed by flash-  
830 freezing in liquid nitrogen. Data collection was carried out at SOLEIL synchrotron (St Aubin,  
831 France). Data were processed, scaled and reduced with XDS and AIMLESS, and the  
832 structures were determined by molecular replacement using Phaser from the suite PHENIX  
833 (Liebschner et al., 2019) and search ensembles obtained from the PBDs 6M0J (RBD), 5I1E  
834 (Cv2.2325), 5VAG (Cv2.6264), 7K3Q (Cv2.1169) and 6YLA (CR3022). The final models were  
835 built by combining real space model building in Coot (Emsley et al., 2010) with reciprocal space  
836 refinement with phenix.refine. The final models were validated with Molprobit (Williams et al.,  
837 2018). Epitope and paratope residues, as well as their interactions, were identified by  
838 accessing PISA at the European Bioinformatics Institute

839 (www.ebi.ac.uk/pdbe/prot\_int/pistart.html) (Krissinel and Henrick, 2007). Superpositions and  
840 figures were rendered using Pymol and UCSF Chimera (Pettersen et al., 2004).

841

#### 842 *Cryo-electron microscopy*

843 The S<sub>6</sub>P protein was incubated with the Cv2.1169 IgA Fab at a 1:3.6 (trimer:Fab) ratio and a  
844 final trimer concentration of 0.8 μM for 1h at room temperature. 3 μl aliquots of the sample  
845 were applied to freshly glow discharged R 1.2/1.3 Quantifoil grids prior to plunge freezing using  
846 a Vitrobot Mk IV (Thermo Fischer Scientific) at 8 °C and 100% humidity (blot 4s, blot force 0).  
847 Data for the complex were acquired on a Titan Krios transmission electron microscope  
848 (Thermo Fischer Scientific) operating at 300 kV, using the EPU automated image acquisition  
849 software (Thermo Fisher Scientific). Movies were collected on a Gatan K3 direct electron  
850 detector operating in counting mode at a nominal magnification of 105,000x (0.85 Å/pixel)  
851 using defocus range of -1.0 μm to -3.0 μm. Movies were collected over a 2 s exposure and a  
852 total dose of ~45 e-/Å<sup>2</sup>.

853

#### 854 *Image processing*

855 All movies were motion-corrected and dose-weighted with MotionCorr2 (Zheng et al., 2017)  
856 and the aligned micrographs were used to estimate the defocus values with patchCTF within  
857 cryosparc (Punjani et al., 2017). CryoSPARC blob picker was used for automated particle  
858 picking and the resulting particles used to obtain initial 2D references, which were then used  
859 to auto-pick the micrographs. An initial 3D model was obtained in cryosparc and used to  
860 perform a 3D classification without imposing any symmetry in Relion (Zivanov et al., 2018).  
861 The best class was selected and subjected to 3D, non-uniform refinement in cryosparc  
862 (Punjani et al., 2020).

863

#### 864 *SARS-CoV-2 infection and treatment in K18-hACE2 mice*

865 B6.Cg-Tg(K18-ACE2)2PrImn/J mice (stock #034860) were imported from The Jackson  
866 Laboratory (Bar Harbor, ME, USA) and bred at the Institut Pasteur under strict SPF conditions.  
867 Infection studies were performed on 6 to 16 wk-old male and female mice, in animal biosafety  
868 level 3 (BSL-3) facilities at the Institut Pasteur, in Paris. All animals were handled in strict  
869 accordance with good animal practice. Animal work was approved by the Animal  
870 Experimentation Ethics Committee (CETEA 89) of the Institut Pasteur (project dap 200008 and  
871 200023) and authorized by the French legislation (under project 24613) in compliance with the  
872 European Communities Council Directives (2010/63/UE, French Law 2013–118, February 6,  
873 2013) and according to the regulations of Pasteur Institute Animal Care Committees before  
874 experiments were initiated. Anesthetized (ketamine/xylazine) mice were inoculated  
875 intranasally (i.n.) with 1 x10<sup>4</sup> or 1 x10<sup>5</sup> PFU of SARS-CoV-2 (20 μl/nostril). Six or 22 h post-  
876 inoculation, mice received an intraperitoneal (i.p.) injection of 5, 10, 20 or 40 mg/kg of  
877 Cv2.1169 IgG or IgA antibody, and of mGO53 control IgG or IgA antibody. Clinical signs of  
878 disease (ruffled fur, hunched posture, reduced mobility and breathing difficulties) and weight  
879 loss were monitored daily during 20 days. Mice were euthanized when they reached pre-  
880 defined end-point criteria. Sera were extracted from blood collected by puncture of the  
881 retromandibular vein.

882

#### 883 *SARS-CoV-2 infection and treatment in golden hamsters*

884 Golden Syrian hamsters (*Mesocricetus auratus*; RjHan:AURA) of 5-6 weeks of age (average  
885 weight 60-80 grams) were purchased from Janvier Laboratories (Le Genest-Saint-Isle,  
886 France), and handled under specific pathogen-free conditions. Golden hamsters were housed  
887 and manipulated in class III safety cabinets in the Pasteur Institute animal facilities accredited  
888 by the French Ministry of Agriculture for performing experiments on live rodents, with *ad libitum*  
889 access to water and food. Animal work was approved by the Animal Experimentation Ethics  
890 Committee (CETEA 89) of the Institut Pasteur (project dap 200023) and authorized by the  
891 French legislation (project #25326) in compliance with the European Communities Council  
892 Directives (2010/63/UE, French Law 2013–118, February 6, 2013) and according to the  
893 regulations of Pasteur Institute Animal Care Committees before experiments were initiated.

894 Animal infection was performed as previously described (de Melo et al., 2021). Briefly,  
895 anesthetized animals were intranasally infected with  $6 \times 10^4$  plaque-forming units (PFU) of  
896 SARS-CoV-2 (BetaCoV/France/IDF00372/2020) (50  $\mu$ l/nostril). Mock-infected animals  
897 received the physiological solution only. Four or 24 h post-intranasal inoculation, hamsters  
898 received an intraperitoneal (i.p.) injection of 10 or 5 mg/kg of Cv2.1169 IgG or IgA antibody,  
899 as well as the mGO53 control antibody or PBS. All hamsters were followed-up daily when the  
900 body weight and the clinical score were noted. At day 5 post-inoculation, animals were  
901 euthanized with an excess of anesthetics (ketamine and xylazine) and exsanguination (AVMA  
902 Guidelines 2020). Blood samples were collected by cardiac puncture; after coagulation, tubes  
903 were centrifuged at 1,500 x g during 10 min at 4°C, and sera were collected and frozen at -  
904 80°C until further analyses. The lungs were weighted and frozen at -80°C until further analyses.  
905 Frozen lungs fragments were weighted and homogenized with 1 ml of ice-cold DMEM  
906 (31966021, Gibco) supplemented with 1% penicillin/streptomycin (15140148, Thermo Fisher)  
907 in Lysing Matrix M 2 ml tubes (116923050-CF, MP Biomedicals) using the FastPrep-24™  
908 system (MP Biomedicals), and the following scheme: homogenization at 4.0 m/s during 20  
909 sec, incubation at 4°C during 2 min, and new homogenization at 4.0 m/s during 20 sec. The  
910 tubes were centrifuged at 10,000 x g during 1 min at 4°C. The supernatants were titrated on  
911 Vero-E6 cells by classical plaque assays using semisolid overlays (Avicel, RC581-NFDR080I,  
912 DuPont) and expressed and PFU/100 mg of tissue (Baer and Kehn-Hall, 2014). Frozen lungs  
913 fragments were homogenized with Trizol (15596026, Invitrogen) in Lysing Matrix D 2 ml tubes  
914 (116913100, MP Biomedicals) using the FastPrep-24™ system (MP Biomedicals), and the  
915 following scheme: homogenization at 6.5 m/s during 60 sec, and centrifugation at 12,000 x g  
916 during 2 min at 4°C. The supernatants were collected and the total RNA was then extracted  
917 using the Direct-zol RNA MiniPrep Kit (R2052, Zymo Research) and quantified using  
918 NanoDrop 2000. The presence of genomic SARS-CoV-2 RNA in these samples was evaluated  
919 by one-step RT-qPCR in a final volume of 25  $\mu$ l per reaction in 96-well PCR plates using a  
920 thermocycler (7500t Real-time PCR system, Applied Biosystems) as previously described  
921 (Melo et al., 2021). Viral load quantification (expressed as RNA copy number/ $\mu$ g of RNA) was  
922 assessed by linear regression using a standard curve of six known quantities of RNA  
923 transcripts containing the *RdRp* sequence (ranging from  $10^7$  to  $10^2$  copies).

#### 924 925 *Quantification and statistical analysis*

926 The numbers of  $V_H$ ,  $V_K$  and  $V_\lambda$  mutations were compared across groups of antibodies using  
927 unpaired Student's t test with Welch's correction. Bivariate correlations were assayed using  
928 two-tailed Pearson correlation test. Statistical analyses were performed using GraphPad  
929 Prism software (v.8.2, GraphPad Prism Inc.). Volcano plot comparing gene features ( $n=206$   
930 parameters) of tri- $S^+$  B cells and normal memory B-cells (mB) was also performed using  
931 GraphPad Prism software (v.8.4, GraphPad Prism Inc.). The y axis indicates the statistics  
932 expressed as  $-\log_{10}$  (p-values) and the x axis represents the differences between the group  
933 means for each parameter. The Barnes-Hut implementation of *t*-distributed stochastic  
934 neighbor embedding (t-SNE) was computed using FlowJo software (v.10.3, FlowJo LLC,  
935 Ashland, OR) with 2000 iterations and a perplexity parameter of 200. Colors represent density  
936 of surface expression markers or cell-populations varying from low (blue) to high (red). Circos  
937 plot linking antibody sequences with at least 75% identity within their CDR<sub>H3</sub> was performed  
938 using online software at <http://mkweb.bcgsc.ca/circos>. Phylogenetic tree was built using CLC  
939 Main Workbench (Qiagen) on aligned  $V_H$  sequences using the Neighbor-Joining method with  
940 a bootstrap analysis on 100 replicates. Mouse survival were compared across groups using a  
941 Kaplan-Meier analysis and Log-rank Mantel-Cox test (GraphPad Prism, v8.2, GraphPad Prism  
942 Inc.). Groups of golden Syrian hamsters were compared across analyses using two-tailed  
943 Mann-Whitney test (GraphPad Prism, v.8.2, GraphPad Prism Inc.). Principal component  
944 analysis (PCA) was performed using the `prcomp()` function in R Studio Server (v1.4.1103).  
945 PCA plots of individuals [`fviz_pca_ind()`], variables [`fviz_pca_var()`], and biplots  
946 [`fviz_pca_biplot()`], were generated using the `factoextra` package (v1.0.7, [https://CRAN.R-](https://CRAN.R-project.org/package=factoextra)  
947 [project.org/package=factoextra](https://CRAN.R-project.org/package=factoextra)). Spearman rank correlations were used to establish  
948 multiparameter associations. All correlograms and scatterplots were created using the `corrplot`

949 and plot R functions, respectively. Correlation plots were generated using GraphPad Prism  
950 (v6.4, GraphPad Prism Inc.).  
951

952 **Acknowledgements**

953 We are grateful to all participants who consented to be part of this study. We thank the  
954 members of the Crystallography core facility (Institut Pasteur) for carrying out robot-driven  
955 crystallization screenings, and of the beamlines Proxima 1 and Proxima 2 at the French  
956 national synchrotron facility (SOLEIL, St Aubin, France). We also thank the Nanolmaging core  
957 facility (Institut Pasteur) for support with sample preparation and image acquisition. The  
958 Nanolmaging Core was created with the help of a grant from the French Government's  
959 Investissements d'Avenir program (EQUIPEX CACSICE, ANR-11-EQPX-0008). This work  
960 was supported by grants from the ANR REACTing Covid19 (#20RR028-00), the European  
961 Commission Horizon 2020 program (RECoVER project, #101003589), the Institut Pasteur  
962 Task Force COVID-19 (2019-NCOV THERAMAB project), the Fondation de France  
963 (#00106077), and partly by a SpikImm-Institut Pasteur R&D program. H.M. also received core  
964 funding from the Institut Pasteur, and the INSERM. M. Backovic (2020-TooLab project)  
965 received support from the "URGENCE COVID-19" fundraising campaign (Institut Pasteur). I.F.  
966 was a recipient of an ANRS post-doctoral fellowship. We thank the members of the SpikImm  
967 team for their support and helpful discussions.

968

969 **Author Contributions**

970 H.M. conceived and supervised the study. J.D.D, F.A., H.B., E. S-L., X.M., F.A.R., O.S. and  
971 H.M. supervised the experiments. C.P., I.F., T.B., G.DDM, M.P., M.B, J.D., L. M-A., J. C., E.G.,  
972 B.V., L.C., L.G., D.P., I.S., F.G-B, and H.M. designed, performed and analyzed the  
973 experiments. M. Backovic, P. G-C. collected and/or processed XRC and cryo-EM data. M. C-  
974 G., French COVID Cohort Study Group, CORSER Study Group and M-N.U. provided human  
975 samples and personal data. M. Boullé, P.C., and S.VDW. contributed with key reagents/assays  
976 and expertise. C.P. and H.M. wrote the manuscript with contributions from all the authors.

977

978 **Declaration of Interests**

979 The Institut Pasteur has filed a provisional patent application on "*Human neutralizing*  
980 *monoclonal antibodies against SARS-CoV-2 and their use thereof*" (EP21306908.1) in which  
981 C.P., I.F., T.B., G.DDM, H.B., X.M., F.R., O.S. and H.M. are inventors, and which was licensed  
982 by the biotech company *SpikImm* for clinical development. H.M. is a scientific consultant for  
983 *SpikImm*, and received consulting fees.

984 **References**

- 985 Andreano, E., Nicastri, E., Paciello, I., Pileri, P., Manganaro, N., Piccini, G., Manenti, A., Pantano, E.,  
986 Kabanova, A., Troisi, M., et al. (2021). Extremely potent human monoclonal antibodies from COVID-19  
987 convalescent patients. *Cell* 184, 1821-1835.e16.
- 988 Anna, F., Goyard, S., Lalanne, A.I., Nevo, F., Gransagne, M., Souque, P., Louis, D., Gillon, V., Turbiez,  
989 I., Bidard, F.C., et al. (2021). High seroprevalence but short-lived immune response to SARS-CoV-2  
990 infection in Paris. *Eur. J. Immunol.* 51, 180–190.
- 991 Baer, A., and Kehn-Hall, K. (2014). Viral concentration determination through plaque assays: Using  
992 traditional and novel overlay systems. *J. Vis. Exp.* 1–10.
- 993 Barnes, C.O., West, A.P., Huey-Tubman, K.E., Hoffmann, M.A.G., Sharaf, N.G., Hoffman, P.R.,  
994 Koranda, N., Gristick, H.B., Gaebler, C., Muecksch, F., et al. (2020a). Structures of Human Antibodies  
995 Bound to SARS-CoV-2 Spike Reveal Common Epitopes and Recurrent Features of Antibodies. *Cell* 1–  
996 15.
- 997 Barnes, C.O., Jette, C.A., Abernathy, M.E., Dam, K.M.A., Esswein, S.R., Gristick, H.B., Malyutin, A.G.,  
998 Sharaf, N.G., Huey-Tubman, K.E., Lee, Y.E., et al. (2020b). SARS-CoV-2 neutralizing antibody  
999 structures inform therapeutic strategies. *Nature* 588, 682–687.
- 1000 Betton, M., Livrozet, M., Planas, D., Fayol, A., Monel, B., Védie, B., Bruel, T., Tartour, E., Robillard, N.,  
1001 Manuguerra, J.-C., et al. (2021). Sera Neutralizing Activities Against Severe Acute Respiratory  
1002 Syndrome Coronavirus 2 and Multiple Variants 6 Months After Hospitalization for Coronavirus Disease  
1003 2019. *Clin. Infect. Dis.* 73, e1337–e1344.
- 1004 Brouwer, P.J.M., Caniels, T.G., van der Straten, K., Snitselaar, J.L., Aldon, Y., Bangaru, S., Torres, J.L.,  
1005 Okba, N.M.A., Claireaux, M., Kerster, G., et al. (2020). Potent neutralizing antibodies from COVID-19  
1006 patients define multiple targets of vulnerability. *Science* 369, 643–650.
- 1007 Bruel T., Hadjadj J., Maes P., Planas D., Seve A., Staropoli I., Guivel-Benhassine F., Porrot F., Bolland  
1008 W-H., Nguyen Y., et al. (2022). Seroneutralization of Omicron BA.1 and BA.2 in patients receiving anti-  
1009 SARS-CoV-2 monoclonal antibodies. *Nat. Med.*
- 1010 Buchrieser, J., Dufloo, J., Hubert, M., Monel, B., Planas, D., Rajah, M.M., Planchais, C., Porrot, F.,  
1011 Guivel-Benhassine, F., Van der Werf, S., et al. (2020). Syncytia formation by SARS-CoV-2-infected  
1012 cells. *EMBO J.* 39, 1–12.
- 1013 Cameroni, E., Bowen, J.E., Rosen, L.E., Saliba, C., Zepeda, S.K., Culap, K., Pinto, D., VanBlargan,  
1014 L.A., De Marco, A., di Iulio, J., et al. (2022). Broadly neutralizing antibodies overcome SARS-CoV-2  
1015 Omicron antigenic shift. *Nature* 602, 664–670.
- 1016 Cao, Y., Su, B., Guo, X., Sun, W., Deng, Y., Bao, L., Zhu, Q., Zhang, X., Zheng, Y., Geng, C., et al.  
1017 (2020). Potent Neutralizing Antibodies against SARS-CoV-2 Identified by High-Throughput Single-Cell  
1018 Sequencing of Convalescent Patients' B Cells. *Cell* 182, 73-84.e16.
- 1019 Cao, Y., Wang, J., Jian, F., Xiao, T., Song, W., Yisimayi, A., Huang, W., Li, Q., Wang, P., An, R., et al.  
1020 (2022a). Omicron escapes the majority of existing SARS-CoV-2 neutralizing antibodies. *Nature* 602,  
1021 657–663.
- 1022 Cao Y., Yisimayi A., Jian F., Xiao T., Song W., Wang J., Du S., Zhang Z., Liu P., Hao X., et al. (2022b).  
1023 Omicron BA.2 specifically evades broad sarbecovirus neutralizing antibodies. *BioRxiv*. 02.07.479349.
- 1024 Chen, E.C., Gilchuk, P., Zost, S.J., Suryadevara, N., Winkler, E.S., Cabel, C.R., Binshtein, E., Chen,  
1025 R.E., Sutton, R.E., Rodriguez, J., et al. (2021). Convergent antibody responses to the SARS-CoV-2  
1026 spike protein in convalescent and vaccinated individuals. *Cell Rep.* 36, 109604.
- 1027 Chertow, D., Stein, S., Ramelli, S., Grazioli, A., Winkler, C., Dickey, J., Platt, A., Pittaluga, S., Herr, D.,  
1028 and Mccurdy, M. (2021). SARS-CoV-2 infection and persistence throughout the human body and brain  
1029 National Institutes of Health.
- 1030 Chi, X., Yan, R., Zhang, J., Zhang, G., Zhang, Y., Hao, M., Zhang, Z., Fan, P., Dong, Y., Yang, Y., et al.  
1031 (2020). A neutralizing human antibody binds to the N-terminal domain of the Spike protein of SARS-  
1032 CoV-2. *Science* 369, 650–655.
- 1033 Corti, D., Purcell, L.A., Snell, G., and Veesler, D. (2021). Tackling COVID-19 with neutralizing  
1034 monoclonal antibodies. *Cell* 184, 3086–3108.
- 1035 Dejnirattisai, W., Zhou, D., Supasa, P., Liu, C., Mentzer, A.J., Ginn, H.M., Zhao, Y., Duyvesteyn, H.M.E.,  
1036 Tuekprakhon, A., Nutalai, R., et al. (2021a). Antibody evasion by the P.1 strain of SARS-CoV-2. *Cell*  
1037 184, 2939-2954.e9.
- 1038 Dejnirattisai, W., Zhou, D., Ginn, H.M., Duyvesteyn, H.M.E., Supasa, P., Case, J.B., Zhao, Y., Walter,  
1039 T.S., Mentzer, A.J., Liu, C., et al. (2021b). The antigenic anatomy of SARS-CoV-2 receptor binding  
1040 domain. *Cell* 2183–2200.
- 1041 Dong, J., Zost, S.J., Greaney, A.J., Starr, T.N., Dingens, A.S., Chen, E.C., Chen, R.E., Case, J.B.,  
1042 Sutton, R.E., Gilchuk, P., et al. (2021). Genetic and structural basis for SARS-CoV-2 variant

- 1043 neutralization by a two-antibody cocktail. *Nat. Microbiol.* 6, 1233–1244.
- 1044 Dufloo, J., Grzelak, L., Staropoli, I., Madec, Y., Tondeur, L., Anna, F., Pelleau, S., Wiedemann, A.,  
1045 Planchais, C., Buchrieser, J., et al. (2021). Asymptomatic and symptomatic SARS-CoV-2 infections elicit  
1046 polyfunctional antibodies. *Cell Reports. Med.* 2, 100275.
- 1047 Emsley, P., Lohkamp, B., Scott, W.G., and Cowtan, K. (2010). Features and development of Coot. *Acta*  
1048 *Crystallogr. Sect. D Biol. Crystallogr.* 66, 486–501.
- 1049 Gaebler, C., Wang, Z., Lorenzi, J.C.C., Muecksch, F., Finkin, S., Tokuyama, M., Cho, A., Jankovic, M.,  
1050 Schaefer-Babajew, D., Oliveira, T.Y., et al. (2021). Evolution of antibody immunity to SARS-CoV-2.  
1051 *Nature* 591, 639–644.
- 1052 Galson, J.D., Schaetzle, S., Bashford-Rogers, R.J.M., Raybould, M.I.J., Kovaltsuk, A., Kilpatrick, G.J.,  
1053 Minter, R., Finch, D.K., Dias, J., James, L.K., et al. (2020). Deep Sequencing of B Cell Receptor  
1054 Repertoires From COVID-19 Patients Reveals Strong Convergent Immune Signatures. *Front. Immunol.*  
1055 11, 605170.
- 1056 Garrett Rappazzo, C., Tse, L. V., Kaku, C.I., Wrapp, D., Sakharkar, M., Huang, D., Deveau, L.M.,  
1057 Yockachonis, T.J., Herbert, A.S., Battles, M.B., et al. (2021). Broad and potent activity against SARS-  
1058 like viruses by an engineered human monoclonal antibody. *Science* (80- ). 371, 823–829.
- 1059 Gentile, I., and Schiano Moriello, N. (2022). COVID-19 prophylaxis in immunosuppressed patients:  
1060 Beyond vaccination. *PLoS Med.* 19, e1003917.
- 1061 Greaney, A.J., Starr, T.N., Gilchuk, P., Zost, S.J., Binshtein, E., Loes, A.N., Hilton, S.K., Huddleston, J.,  
1062 Eguia, R., Crawford, K.H.D., et al. (2021). Complete Mapping of Mutations to the SARS-CoV-2 Spike  
1063 Receptor-Binding Domain that Escape Antibody Recognition. *Cell Host Microbe* 29, 44-57.e9.
- 1064 Gruell, H., Vanshylla, K., Tober-Lau, P., Hillus, D., Schommers, P., Lehmann, C., Kurth, F., Sander,  
1065 L.E., and Klein, F. (2022). mRNA booster immunization elicits potent neutralizing serum activity against  
1066 the SARS-CoV-2 Omicron variant. *Nat. Med.*
- 1067 Grzelak, L., Temmam, S., Planchais, C., Demeret, C., Tondeur, L., Huon, C., Guivel-Benhassine, F.,  
1068 Staropoli, I., Chazal, M., Dufloo, J., et al. (2020). A comparison of four serological assays for detecting  
1069 anti-SARS-CoV-2 antibodies in human serum samples from different populations. *Sci. Transl. Med.* 12.  
1070 Han, P., Su, C., Zhang, Y., Bai, C., Zheng, A., Qiao, C., Wang, Q., Niu, S., Chen, Q., Zhang, Y., et al.  
1071 (2021). Molecular insights into receptor binding of recent emerging SARS-CoV-2 variants. *Nat.*  
1072 *Commun.* 12.
- 1073 Hansen, J., Baum, A., Pascal, K.E., Russo, V., Giordano, S., Wloga, E., Fulton, B.O., Yan, Y., Koon, K.,  
1074 Patel, K., et al. (2020). Studies in humanized mice and convalescent humans yield a SARS-CoV-2  
1075 antibody cocktail. *Science* (80- ). 369, 1010–1014.
- 1076 Hoffmann, M., Kleine-Weber, H., Schroeder, S., Krüger, N., Herrler, T., Erichsen, S., Schiergens, T.S.,  
1077 Herrler, G., Wu, N.H., Nitsche, A., et al. (2020). SARS-CoV-2 Cell Entry Depends on ACE2 and  
1078 TMPRSS2 and Is Blocked by a Clinically Proven Protease Inhibitor. *Cell* 181, 271-280.e8.
- 1079 Hsieh, C., Goldsmith, J.A., Schaub, J.M., Divenere, A.M., Kuo, H., Javanmardi, K., Le, K.C., Wrapp, D.,  
1080 Lee, A.G., Liu, Y., et al. (2020). Structure-based design of prefusion-stabilized SARS-CoV-2 spikes.  
1081 *1505*, 1501–1505.
- 1082 Imai, M., Iwatsuki-Horimoto, K., Hatta, M., Loeber, S., Halfmann, P.J., Nakajima, N., Watanabe, T., Ujje,  
1083 M., Takahashi, K., Ito, M., et al. (2020). Syrian hamsters as a small animal model for SARS-CoV-2  
1084 infection and countermeasure development. *Proc. Natl. Acad. Sci. U. S. A.* 117, 16587–16595.
- 1085 Jérémy Dufloo, Luivine Grzelak, Isabelle Staropoli, Yoann Madec, Laura Tondeur, François Anna,  
1086 Stéphane Pelleau, Aurélie Wiedemann, Cyril Planchais, Julian Buchrieser, Rémy Robinot, Marie-Noëlle  
1087 Ungeheuer, Hugo Mouquet, Pierre Charneau, Michael White, Yv, T.B. (2020). Asymptomatic and  
1088 symptomatic SARS-CoV-2 infections elicit polyfunctional antibodies.
- 1089 Jones, B.E., Brown-Augsburger, P.L., Corbett, K.S., Westendorf, K., Davies, J., Cujec, T.P., Wiethoff,  
1090 C.M., Blackbourne, J.L., Heinz, B.A., Foster, D., et al. (2021). The neutralizing antibody, LY-CoV555,  
1091 protects against SARS-CoV-2 infection in nonhuman primates. *Sci. Transl. Med.* 13, 1–18.
- 1092 Ju, B., Zhang, Q., Ge, J., Wang, R., Sun, J., Ge, X., Yu, J., Shan, S., Zhou, B., Song, S., et al. (2020).  
1093 Human neutralizing antibodies elicited by SARS-CoV-2 infection. *Nature* 584, 115–119.
- 1094 Juno, J.A., Tan, H.X., Lee, W.S., Reynaldi, A., Kelly, H.G., Wragg, K., Esterbauer, R., Kent, H.E., Batten,  
1095 C.J., Mordant, F.L., et al. (2020). Humoral and circulating follicular helper T cell responses in recovered  
1096 patients with COVID-19. *Nat. Med.* 26, 1428–1434.
- 1097 Ke, Z., Oton, J., Qu, K., Cortese, M., Zila, V., McKeane, L., Nakane, T., Zivanov, J., Neufeldt, C.J.,  
1098 Cerikan, B., et al. (2020). Structures and distributions of SARS-CoV-2 spike proteins on intact virions.  
1099 *Nature*.
- 1100 Kelley, B. (2020). Developing therapeutic monoclonal antibodies at pandemic pace. *Nat. Biotechnol.* 38,  
1101 540–545.
- 1102 Kim, C., Ryu, D.K., Lee, J., Kim, Y. II, Seo, J.M., Kim, Y.G., Jeong, J.H., Kim, M., Kim, J.I., Kim, P., et



- 1103 al. (2021). A therapeutic neutralizing antibody targeting receptor binding domain of SARS-CoV-2 spike  
1104 protein. *Nat. Commun.* 12, 1–10.
- 1105 Koide, S. (2009). Engineering of recombinant crystallization chaperones. *Curr. Opin. Struct. Biol.* 19,  
1106 449–457.
- 1107 Krammer, F. (2021). A correlate of protection for SARS-CoV-2 vaccines is urgently needed. *Nat. Med.*  
1108 27, 1147–1148.
- 1109 Kreer, C., Zehner, M., Weber, T., Ercanoglu, M.S., Gieselmann, L., Rohde, C., Halwe, S., Korenkov,  
1110 M., Schommers, P., Vanshylla, K., et al. (2020). Longitudinal Isolation of Potent Near-Germline SARS-  
1111 CoV-2-Neutralizing Antibodies from COVID-19 Patients. *Cell* 1–12.
- 1112 Kreye, J., Reincke, S.M., Kornau, H.-C., Sánchez-Sendin, E., Corman, V.M., Liu, H., Yuan, M., Wu,  
1113 N.C., Zhu, X., Lee, C.-C.D., et al. (2020). A Therapeutic Non-self-reactive SARS-CoV-2 Antibody  
1114 Protects from Lung Pathology in a COVID-19 Hamster Model. *Cell* 183, 1058-1069.e19.
- 1115 Krissinel, E., and Henrick, K. (2007). Inference of Macromolecular Assemblies from Crystalline State. *J.*  
1116 *Mol. Biol.* 372, 774–797.
- 1117 Kumar, S., Chandele, A., and Sharma, A. (2021). Current status of therapeutic monoclonal antibodies  
1118 against SARS-CoV-2. *PLOS Pathog.* 17, e1009885.
- 1119 Lan, J., Ge, J., Yu, J., Shan, S., Zhou, H., Fan, S., Zhang, Q., Shi, X., Wang, Q., Zhang, L., et al. (2020).  
1120 Structure of the SARS-CoV-2 spike receptor-binding domain bound to the ACE2 receptor. *Nature* 581,  
1121 215–220.
- 1122 Liebschner, D., Afonine, P. V., Baker, M.L., Bunkoczi, G., Chen, V.B., Croll, T.I., Hintze, B., Hung, L.W.,  
1123 Jain, S., McCoy, A.J., et al. (2019). Macromolecular structure determination using X-rays, neutrons and  
1124 electrons: Recent developments in Phenix. *Acta Crystallogr. Sect. D Struct. Biol.* 75, 861–877.
- 1125 Liu, L., Wang, P., Nair, M.S., Yu, J., Rapp, M., Wang, Q., Luo, Y., Chan, J.F.-W., Sahi, V., Figueroa, A.,  
1126 et al. (2020). Potent neutralizing antibodies against multiple epitopes on SARS-CoV-2 spike. *Nature*  
1127 584, 450–456.
- 1128 Locci, M., Havenar-Daughton, C., Landais, E., Wu, J., Kroenke, M.A., Arlehamn, C.L., Su, L.F., Cubas,  
1129 R., Davis, M.M., Sette, A., et al. (2013). Human Circulating PD-1+CXCR3–CXCR5+ Memory Tfh Cells  
1130 Are Highly Functional and Correlate with Broadly Neutralizing HIV Antibody Responses. *Immunity* 39,  
1131 758–769.
- 1132 Long, Q.X., Liu, B.Z., Deng, H.J., Wu, G.C., Deng, K., Chen, Y.K., Liao, P., Qiu, J.F., Lin, Y., Cai, X.F.,  
1133 et al. (2020). Antibody responses to SARS-CoV-2 in patients with COVID-19. *Nat. Med.* 26, 845–848.
- 1134 Lorin, V., and Mouquet, H. (2015). Efficient generation of human IgA monoclonal antibodies. *J. Immunol.*  
1135 *Methods* 422, 102–110.
- 1136 Lorin, V., Fernández, I., Masse-Ranson, G., Bouvin-Pley, M., Molinos-Albert, L.M., Planchais, C., Hieu,  
1137 T., Péhau-Arnaudet, G., Hrebík, D., Girelli-Zubani, G., et al. (2022). Epitope convergence of broadly  
1138 HIV-1 neutralizing IgA and IgG antibody lineages in a viremic controller. *J. Exp. Med.* 219.
- 1139 Meffre, E., Schaefer, A., Wardemann, H., Wilson, P., Davis, E., and Nussenzweig, M.C. (2004).  
1140 Surrogate Light Chain Expressing Human Peripheral B Cells Produce Self-reactive Antibodies. *J. Exp.*  
1141 *Med.* 199, 145–150.
- 1142 Melo, G.D., Lazarini, F., Larrous, F., Feige, L., Kornobis, E., Levallois, S., Marchio, A., Kergoat, L.,  
1143 Hardy, D., Cokelaer, T., et al. (2021). Attenuation of clinical and immunological outcomes during SARS-  
1144 CoV-2 infection by ivermectin. *EMBO Mol. Med.* 13, 1–14.
- 1145 de Melo, G.D., Lazarini, F., Larrous, F., Feige, L., Kornobis, E., Levallois, S., Marchio, A., Kergoat, L.,  
1146 Hardy, D., Cokelaer, T., et al. (2021). Attenuation of clinical and immunological outcomes during SARS-  
1147 CoV-2 infection by ivermectin. *EMBO Mol. Med.* 13, e14122.
- 1148 Ter Meulen, J., Van Den Brink, E.N., Poon, L.L.M., Marissen, W.E., Leung, C.S.W., Cox, F., Cheung,  
1149 C.Y., Bakker, A.Q., Bogaards, J.A., Van Deventer, E., et al. (2006). Human monoclonal antibody  
1150 combination against SARS coronavirus: Synergy and coverage of escape mutants. *PLoS Med.* 3, 1071–  
1151 1079.
- 1152 Morita, R., Schmitt, N., Bentebibel, S.E., Ranganathan, R., Bourdery, L., Zurawski, G., Foucat, E.,  
1153 Dullaers, M., Oh, S.K., Sabzghabaei, N., et al. (2011). Human Blood CXCR5+CD4+ T Cells Are  
1154 Counterparts of T Follicular Cells and Contain Specific Subsets that Differentially Support Antibody  
1155 Secretion. *Immunity* 34, 108–121.
- 1156 Mouquet, H., Klein, F., Scheid, J.F., Warncke, M., Pietzsch, J., Oliveira, T.Y.K., Velinzon, K., Seaman,  
1157 M.S., and Nussenzweig, M.C. (2011). Memory B Cell Antibodies to HIV-1 gp140 Cloned from Individuals  
1158 Infected with Clade A and B Viruses. *PLoS One* 6, e24078.
- 1159 Mouquet, H., Scharf, L., Euler, Z., Liu, Y., Eden, C., Scheid, J.F., Halper-Stromberg, A.,  
1160 Gnanapragasam, P.N.P., Spencer, D.I.R., Seaman, M.S., et al. (2012). Complex-type N-glycan  
1161 recognition by potent broadly neutralizing HIV antibodies. *Proc. Natl. Acad. Sci.* 109, E3268–E3277.
- 1162 Nielsen, S.C.A., Yang, F., Jackson, K.J.L., Hoh, R.A., Röltgen, K., Jean, G.H., Stevens, B.A., Lee, J.-

1163 Y., Rustagi, A., Rogers, A.J., et al. (2020). Human B Cell Clonal Expansion and Convergent Antibody  
1164 Responses to SARS-CoV-2. *Cell Host Microbe* 28, 516-525.e5.  
1165 Noy-Porat, T., Mechaly, A., Levy, Y., Makdasi, E., Alcalay, R., Gur, D., Aftalion, M., Falach, R., Leviatan  
1166 Ben-Arye, S., Lazar, S., et al. (2021). Therapeutic antibodies, targeting the SARS-CoV-2 spike N-  
1167 terminal domain, protect lethally infected K18-hACE2 mice. *IScience* 24, 102479.  
1168 Pelleau, S., Wiedemann, A., Planchais, C., Buchrieser, J., and Robinot, R. (2020). Asymptomatic and  
1169 symptomatic SARS-CoV-2 infections elicit polyfunctional antibodies.  
1170 Pettersen, E.F., Goddard, T.D., Huang, C.C., Couch, G.S., Greenblatt, D.M., Meng, E.C., and Ferrin,  
1171 T.E. (2004). UCSF Chimera - A visualization system for exploratory research and analysis. *J. Comput.*  
1172 *Chem.* 25, 1605–1612.  
1173 Pinto, D., Park, Y.J., Beltramello, M., Walls, A.C., Tortorici, M.A., Bianchi, S., Jaconi, S., Culap, K., Zatta,  
1174 F., De Marco, A., et al. (2020). Cross-neutralization of SARS-CoV-2 by a human monoclonal SARS-  
1175 CoV antibody. *Nature* 583, 290–295.  
1176 Pinto, D., Sauer, M.M., Czudnochowski, N., Low, J.S., Tortorici, M.A., Housley, M.P., Noack, J., Walls,  
1177 A.C., Bowen, J.E., Guarino, B., et al. (2021). Broad betacoronavirus neutralization by a stem helix-  
1178 specific human antibody. *Science* (80- ). 3321, eabj3321.  
1179 Planas, D., Bruel, T., Grzelak, L., Guivel-Benhassine, F., Staropoli, I., Porrot, F., Planchais, C.,  
1180 Buchrieser, J., Rajah, M.M., Bishop, E., et al. (2021a). Sensitivity of infectious SARS-CoV-2 B.1.1.7 and  
1181 B.1.351 variants to neutralizing antibodies. *Nat. Med.* 27, 917–924.  
1182 Planas, D., Veyer, D., Baidaliuk, A., Staropoli, I., Guivel-Benhassine, F., Rajah, M.M., Planchais, C.,  
1183 Porrot, F., Robillard, N., Puech, J., et al. (2021b). Reduced sensitivity of SARS-CoV-2 variant Delta to  
1184 antibody neutralization. *Nature* 596, 276–280.  
1185 Planas, D., Saunders, N., Maes, P., Guivel-Benhassine, F., Planchais, C., Buchrieser, J., Bolland, W.-  
1186 H., Porrot, F., Staropoli, I., Lemoine, F., et al. (2022). Considerable escape of SARS-CoV-2 Omicron to  
1187 antibody neutralization. *Nature* 602, 671–675.  
1188 Planchais, C., Kök, A., Kanyavuz, A., Lorin, V., Bruel, T., Guivel-Benhassine, F., Rollenske, T., Prigent,  
1189 J., Hieu, T., Prazuck, T., et al. (2019). HIV-1 Envelope Recognition by Polyreactive and Cross-Reactive  
1190 Intestinal B Cells. *Cell Rep.* 27, 572-585.e7.  
1191 Prigent, J., Lorin, V., Kök, A., Hieu, T., Bourgeau, S., and Mouquet, H. (2016). Scarcity of autoreactive  
1192 human blood IgA + memory B cells. *Eur. J. Immunol.* 46, 2340–2351.  
1193 Punjani, A., Rubinstein, J.L., Fleet, D.J., and Brubaker, M.A. (2017). cryoSPARC: algorithms for rapid  
1194 unsupervised cryo-EM structure determination. *Nat. Methods* 14, 290–296.  
1195 Punjani, A., Zhang, H., and Fleet, D.J. (2020). Non-uniform refinement: adaptive regularization improves  
1196 single-particle cryo-EM reconstruction. *Nat. Methods* 17, 1214–1221.  
1197 Radvak, P., Kwon, H.-J., Kosikova, M., Ortega-Rodriguez, U., Xiang, R., Phue, J.-N., Shen, R.-F.,  
1198 Rozzelle, J., Kapoor, N., Rabara, T., et al. (2021). SARS-CoV-2 B.1.1.7 (alpha) and B.1.351 (beta)  
1199 variants induce pathogenic patterns in K18-hACE2 transgenic mice distinct from early strains. *Nat.*  
1200 *Commun.* 12, 1–15.  
1201 Robbiani, D.F., Gaebler, C., Muecksch, F., Lorenzi, J.C.C., Wang, Z., Cho, A., Agudelo, M., Barnes,  
1202 C.O., Gazumyan, A., Finkin, S., et al. (2020). Convergent antibody responses to SARS-CoV-2 in  
1203 convalescent individuals. *Nature*.  
1204 Rogers, T.F., Zhao, F., Huang, D., Beutler, N., Burns, A., He, W.-T., Limbo, O., Smith, C., Song, G.,  
1205 Woehl, J., et al. (2020). Isolation of potent SARS-CoV-2 neutralizing antibodies and protection from  
1206 disease in a small animal model. *Science* 369, 956–963.  
1207 Rosenfeld, R., Noy-Porat, T., Mechaly, A., Makdasi, E., Levy, Y., Alcalay, R., Falach, R., Aftalion, M.,  
1208 Epstein, E., Gur, D., et al. (2021). Post-exposure protection of SARS-CoV-2 lethal infected K18-hACE2  
1209 transgenic mice by neutralizing human monoclonal antibody. *Nat. Commun.* 12, 2–10.  
1210 Rujas, E., Kucharska, I., Tan, Y.Z., Benlekbir, S., Cui, H., Zhao, T., Wasney, G.A., Budyłowski, P.,  
1211 Guvenc, F., Newton, J.C., et al. (2021). Multivalency transforms SARS-CoV-2 antibodies into ultrapotent  
1212 neutralizers. *Nat. Commun.* 12, 1–12.  
1213 Schäfer, A., Muecksch, F., Lorenzi, J.C.C., Leist, S.R., Cipolla, M., Bournazos, S., Schmidt, F., Maison,  
1214 R.M., Gazumyan, A., Martinez, D.R., et al. (2021). Antibody potency, effector function, and combinations  
1215 in protection and therapy for SARS-CoV-2 infection in vivo. *J. Exp. Med.* 218.  
1216 Schmidt, F., Weisblum, Y., Rutkowska, M., Poston, D., DaSilva, J., Zhang, F., Bednarski, E., Cho, A.,  
1217 Schaefer-Babajew, D.J., Gaebler, C., et al. (2021). High genetic barrier to SARS-CoV-2 polyclonal  
1218 neutralizing antibody escape. *Nature* 600, 512–516.  
1219 Sette, A., and Crotty, S. (2021). Adaptive immunity to SARS-CoV-2 and COVID-19. *Cell* 184, 861–880.  
1220 Shi, R., Shan, C., Duan, X., Chen, Z., Liu, P., Song, J., Song, T., Bi, X., Han, C., Wu, L., et al. (2020).  
1221 A human neutralizing antibody targets the receptor-binding site of SARS-CoV-2. *Nature* 584, 120–124.  
1222 Sia, S.F., Yan, L.M., Chin, A.W.H., Fung, K., Choy, K.T., Wong, A.Y.L., Kaewpreedee, P., Perera,

- 1223 R.A.P.M., Poon, L.L.M., Nicholls, J.M., et al. (2020). Pathogenesis and transmission of SARS-CoV-2 in  
1224 golden hamsters. *Nature* 583, 834–838.
- 1225 Singh, D.D., Sharma, A., Lee, H.-J., and Yadav, D.K. (2022). SARS-CoV-2: Recent Variants and Clinical  
1226 Efficacy of Antibody-Based Therapy. *Front. Cell. Infect. Microbiol.* 12, 839170.
- 1227 Smith, N., Goncalves, P., Charbit, B., Grzelak, L., Beretta, M., Planchais, C., Bruel, T., Rouilly, V.,  
1228 Bondet, V., Hadjadj, J., et al. (2021). Distinct systemic and mucosal immune responses during acute  
1229 SARS-CoV-2 infection. *Nat. Immunol.* 22, 1428–1439.
- 1230 Sokal, A., Chappert, P., Barba-Spaeth, G., Roeser, A., Fourati, S., Azzaoui, I., Vandenberghe, A.,  
1231 Fernandez, I., Meola, A., Bouvier-Alias, M., et al. (2021). Maturation and persistence of the anti-SARS-  
1232 CoV-2 memory B cell response. *Cell* 184, 1201-1213.e14.
- 1233 Starr, T.N., Czudnochowski, N., Liu, Z., Zatta, F., Park, Y.J., Addetia, A., Pinto, D., Beltramello, M.,  
1234 Hernandez, P., Greaney, A.J., et al. (2021). SARS-CoV-2 RBD antibodies that maximize breadth and  
1235 resistance to escape. *Nature* 597, 97–102.
- 1236 Sterlin, D., Mathian, A., Miyara, M., Mohr, A., Anna, F., Claër, L., Quentric, P., Fadlallah, J., Devilliers,  
1237 H., Ghillani, P., et al. (2021). IgA dominates the early neutralizing antibody response to SARS-CoV-2.  
1238 *Sci. Transl. Med.* 13.
- 1239 Sun, L., Kallolimath, S., Palt, R., Stiasny, K., and Mayrhofer, P. (2021). Increased in vitro neutralizing  
1240 activity of SARS-CoV-2 IgA1 dimers compared to monomers and IgG. 3–4.
- 1241 Tiller, T., Meffre, E., Yurasov, S., Tsuiji, M., Nussenzweig, M.C., and Wardemann, H. (2008). Efficient  
1242 generation of monoclonal antibodies from single human B cells by single cell RT-PCR and expression  
1243 vector cloning. *J. Immunol. Methods* 329, 112–124.
- 1244 Tortorici, M.A., Beltramello, M., Lempp, F.A., Pinto, D., Dang, H. V., Rosen, L.E., McCallum, M., Bowen,  
1245 J., Minola, A., Jaconi, S., et al. (2020). Ultrapotent human antibodies protect against SARS-CoV-2  
1246 challenge via multiple mechanisms. *Science* 370, 950–957.
- 1247 Vanshylla, K., Fan, C., Wunsch, M., Poopalasingam, N., Meijers, M., Kreer, C., Kleipass, F.,  
1248 Ruchnewitz, D., Ercanoglu, M.S., Gruell, H., et al. (2022). Discovery of ultrapotent broadly neutralizing  
1249 antibodies from SARS-CoV-2 elite neutralizers. *Cell Host Microbe* 30, 69-82.e10.
- 1250 Walls, A.C., Park, Y.-J., Tortorici, M.A., Wall, A., McGuire, A.T., and Velesler, D. (2020). Structure,  
1251 Function, and Antigenicity of the SARS-CoV-2 Spike Glycoprotein. *Cell* 1–12.
- 1252 Wang, L., Zhou, T., Zhang, Y., Yang, E.S., Schramm, C.A., Shi, W., Pegu, A., Oloniniyi, O.K., Henry,  
1253 A.R., Darko, S., et al. (2021a). Ultrapotent antibodies against diverse and highly transmissible SARS-  
1254 CoV-2 variants. *Science* (80- ). 373, 0–15.
- 1255 Wang, Z., Lorenzi, J.C.C., Muecksch, F., Finkin, S., Viant, C., Gaebler, C., Cipolla, M., Hoffmann, H.H.,  
1256 Oliveira, T.Y., Oren, D.A., et al. (2021b). Enhanced SARS-CoV-2 neutralization by dimeric IgA. *Sci.*  
1257 *Transl. Med.* 13.
- 1258 Wang, Z., Muecksch, F., Schaefer-Babajew, D., Finkin, S., Viant, C., Gaebler, C., Hoffmann, H.-H.,  
1259 Barnes, C.O., Cipolla, M., Ramos, V., et al. (2021c). Naturally enhanced neutralizing breadth against  
1260 SARS-CoV-2 one year after infection. *Nature* 595, 426–431.
- 1261 Wardemann, H. (2003). Predominant Autoantibody Production by Early Human B Cell Precursors.  
1262 *Science* (80- ). 301, 1374–1377.
- 1263 Wec, A.Z., Wrapp, D., Herbert, A.S., Maurer, D.P., Haslwanter, D., Sakharkar, M., Jangra, R.K., Dieterle,  
1264 M.E., Lilov, A., Huang, D., et al. (2020). Broad neutralization of SARS-related viruses by human  
1265 monoclonal antibodies. *Science* (80- ). 7424, eabc7424.
- 1266 Westendorf, K., Wang, L., Žentelis, S., Foster, D., Vaillancourt, P., Wiggin, M., Lovett, E., van der Lee,  
1267 R., Hendle, J., Pustilnik, A., et al. (2022). LY-CoV1404 (bebtelovimab) potently neutralizes SARS-CoV-  
1268 2 variants. *BioRxiv Prepr. Serv. Biol.*
- 1269 WHO (2022). WHO Coronavirus (COVID-19) Dashboard.
- 1270 Wibmer, C.K., Ayres, F., Hermanus, T., Madzivhandila, M., Kgagudi, P., Oosthuysen, B., Lambson,  
1271 B.E., de Oliveira, T., Vermeulen, M., van der Berg, K., et al. (2021). SARS-CoV-2 501Y.V2 escapes  
1272 neutralization by South African COVID-19 donor plasma. *Nat. Med.* 27, 622–625.
- 1273 Williams, C.J., Headd, J.J., Moriarty, N.W., Prisant, M.G., Videau, L.L., Deis, L.N., Verma, V., Keedy,  
1274 D.A., Hintze, B.J., Chen, V.B., et al. (2018). MolProbity: More and better reference data for improved  
1275 all-atom structure validation. *Protein Sci.* 27, 293–315.
- 1276 Winkler, E.S., Gilchuk, P., Yu, J., Bailey, A.L., Chen, R.E., Chong, Z., Zost, S.J., Jang, H., Huang, Y.,  
1277 Allen, J.D., et al. (2021). Human neutralizing antibodies against SARS-CoV-2 require intact Fc effector  
1278 functions for optimal therapeutic protection. *Cell* 184, 1804-1820.e16.
- 1279 Wrapp, D., Wang, N., Corbett, K.S., Goldsmith, J.A., Hsieh, C.L., Abiona, O., Graham, B.S., and  
1280 McLellan, J.S. (2020). Cryo-EM structure of the 2019-nCoV spike in the prefusion conformation. *Science*  
1281 (80- ). 367, 1260–1263.
- 1282 Yan, R., Zhang, Y., Li, Y., Xia, L., Guo, Y., and Zhou, Q. (2020). Structural basis for the recognition of

- 1283 the SARS-CoV-2 by full-length human ACE2. *Science* 2762, 1–10.
- 1284 Yuan, M., Liu, H., Wu, N.C., Lee, C.C.D., Zhu, X., Zhao, F., Huang, D., Yu, W., Hua, Y., Tien, H., et al.
- 1285 (2020). Structural basis of a shared antibody response to SARS-CoV-2. *Science* (80-. ). 369, 1119–
- 1286 1123.
- 1287 Yuan, M., Huang, D., Lee, C.C.D., Wu, N.C., Jackson, A.M., Zhu, X., Liu, H., Peng, L., van Gils, M.J.,
- 1288 Sanders, R.W., et al. (2021). Structural and functional ramifications of antigenic drift in recent SARS-
- 1289 CoV-2 variants. *Science* (80-. ). 373, 818–823.
- 1290 Zheng, S.Q., Palovcak, E., Armache, J.-P., Verba, K.A., Cheng, Y., and Agard, D.A. (2017). MotionCor2:
- 1291 anisotropic correction of beam-induced motion for improved cryo-electron microscopy. *Nat. Methods* 14,
- 1292 331–332.
- 1293 Zhou, D., Dejnirattisai, W., Supasa, P., Liu, C., Mentzer, A.J., Ginn, H.M., Zhao, Y., Duyvesteyn, H.M.E.,
- 1294 Tuekprakhon, A., Nutalai, R., et al. (2021a). Evidence of escape of SARS-CoV-2 variant B.1.351 from
- 1295 natural and vaccine-induced sera. *Cell* 1–14.
- 1296 Zhou, Y., Liu, Z., Li, S., Xu, W., Zhang, Q., Silva, I.T., Li, C., Wu, Y., Jiang, Q., Liu, Z., et al. (2021b).
- 1297 Enhancement versus neutralization by SARS-CoV-2 antibodies from a convalescent donor associates
- 1298 with distinct epitopes on the RBD. *Cell Rep.* 34.
- 1299 Zivanov, J., Nakane, T., Forsberg, B.O., Kimanius, D., Hagen, W.J., Lindahl, E., and Scheres, S.H.
- 1300 (2018). New tools for automated high-resolution cryo-EM structure determination in RELION-3. *Elife* 7.
- 1301 Zost, S.J., Gilchuk, P., Chen, R.E., Case, J.B., Reidy, J.X., Trivette, A., Nargi, R.S., Sutton, R.E.,
- 1302 Suryadevara, N., Chen, E.C., et al. (2020a). Rapid isolation and profiling of a diverse panel of human
- 1303 monoclonal antibodies targeting the SARS-CoV-2 spike protein. *Nat. Med.*
- 1304 Zost, S.J., Gilchuk, P., Case, J.B., Binshtein, E., Chen, R.E., Nkolola, J.P., Schäfer, A., Reidy, J.X.,
- 1305 Trivette, A., Nargi, R.S., et al. (2020b). Potently neutralizing and protective human antibodies against
- 1306 SARS-CoV-2. *Nature* 584, 443–449.

1307 **Figure Legends**  
1308 **Figure 1. SARS-CoV-2 spike-specific memory antibodies cloned from convalescent**  
1309 **COVID-19 individuals. (A)** Dot plots showing the IgG antibody binding to SARS-CoV-2 tri-S  
1310 as area under the curve (AUC) values determined by ELISA with serially-diluted sera from  
1311 convalescent COVID-19 individuals in the CORSER (n=212; two timepoints t1 and t2) and  
1312 French COVID-19 cohorts (n=159; with a follow-up overtime for some samples). Colored dots  
1313 (blue and purple) show selected samples tested in (B). Purple dots indicate samples tested in  
1314 (C). **(B)** Heatmap showing the IgG, IgG subclass and IgA seroreactivity of selected  
1315 convalescent COVID-19 individuals from the CORSER (n=8) and French COVID-19 (n=34)  
1316 cohorts against SARS-CoV-2 tri-S and RBD proteins as measured in Figure S1B. Samples  
1317 were also tested against MERS tri-S to assay for cross-reactivity against another  $\beta$ -  
1318 coronavirus. **(C)** Heatmap showing the antibody binding of serum IgG and IgA antibodies  
1319 purified from selected convalescent donors against SARS-CoV-2 antigens and trimeric spike  
1320 proteins from other coronaviruses ( $\alpha$ ,  $\alpha$ - coronaviruses;  $\beta$ ,  $\beta$ -coronaviruses) as measured in  
1321 Figures S1D and S1E. RBD, receptor binding domain; FP, fusion peptide. **(D)** Graph showing  
1322 the *in vitro* SARS-CoV-2 neutralizing activity of purified serum IgG and IgA antibodies from  
1323 selected COVID-19 convalescents (left). Calculated IC<sub>50</sub> values are presented in the heatmap  
1324 on the right. **(E)** Flow-cytometric plots showing the SARS-CoV-2 S-binding IgG<sup>+</sup> and IgA<sup>+</sup>  
1325 memory B cells in the blood from convalescent donors. Flow-cytometric histograms in the  
1326 upper left-hand corner show the proportion of RBD<sup>+</sup> cells among SARS-CoV-2 S-binding IgG<sup>+</sup>  
1327 and IgA<sup>+</sup> memory B lymphocytes. **(F)** Bubble plots showing the reactivity of human IgG mAbs  
1328 cloned from SARS-CoV-2 S-binding IgG<sup>+</sup> and IgA<sup>+</sup> memory B cells of convalescent donors  
1329 against SARS-CoV-2 S protein as measured by S-Flow (Y axis), tri-S ELISA (X axis) and tri-  
1330 S-capture ELISA (bubble size). For each donor, the pie chart shows the proportion of SARS-  
1331 CoV-2 S-specific antibodies from cloned antibodies (top; total number indicated in the pie chart  
1332 center) and the number (n) of variants in each SARS-CoV-2 S-specific B-cell clonal family.  
1333 See also **Table S1** and **Figure S1**.

1334  
1335 **Figure 2. Immunophenotyping and antibody gene repertoire of SARS-CoV-2 spike-**  
1336 **specific memory B cells. (A)** Violin plots showing the percentage of SARS-CoV-2 tri-S<sup>+</sup> cells  
1337 among total IgG<sup>+</sup> and IgA<sup>+</sup> memory B cells (top) and of SARS-CoV-2 RBD<sup>+</sup> cells among tri-S<sup>+</sup>  
1338 IgG<sup>+</sup> and IgA<sup>+</sup> memory B cells (bottom) in the blood of convalescent COVID-19 individuals  
1339 (n=10). **(B)** Pseudocolor plots showing the t-SNE analysis of concatenated CD19<sup>+</sup>CD10<sup>-</sup> B  
1340 cells in convalescent COVID-19 individuals (n=10). Density maps presenting the staining  
1341 intensity of CD27 and CD21 markers used to define memory B-cell subsets. IM (Intermediate  
1342 memory, CD27<sup>+</sup>CD21<sup>+</sup>), RM (resting memory CD27<sup>+</sup>CD21<sup>+</sup>), AM (activated memory,  
1343 CD27<sup>+</sup>CD21<sup>-</sup>), TLM (tissue-like memory CD27<sup>-</sup>CD21<sup>-</sup>). Black and pink dots indicate tri-S<sup>+</sup> and  
1344 RBD<sup>+</sup> IgG<sup>+</sup> and IgA<sup>+</sup> B memory cells in the density map. **(C)** Violin plots showing the distribution  
1345 of total and SARS-CoV-2 tri-S<sup>+</sup> IgG<sup>+</sup> and IgA<sup>+</sup> memory B-cell subset frequencies as depicted  
1346 in (B). CS mB, class-switched memory B cells in convalescent COVID-19 individuals (n=10).  
1347 **(D)** Immunophenotyping flow cytometric plots showing the expression of B-cell surface  
1348 markers on sorted SARS-CoV-2 tri-S-specific B cells (n=101, black, blue and purple dots).  
1349 Blue dots indicate potent neutralizing antibodies while the purple dot is the ultra-potent  
1350 neutralizer Cv2.1169 (purple arrow). **(E)** Violin plots showing the frequency of total CD4<sup>+</sup>,  
1351 CD4<sup>+</sup>CXCR5<sup>+</sup> lymphocytes and circulating follicular helper T cell (cTfh) subsets in the blood of  
1352 convalescent COVID-19 individuals (n=10). **(F)** Violin plots comparing the frequency of PD1<sup>+</sup>,  
1353 PD1<sup>hi</sup>, ICOS<sup>+</sup> and ICOS<sup>+</sup>PD1<sup>+</sup> cells among cTh1, cTfh2 and cTh17 subsets in the blood of  
1354 convalescent COVID-19 individuals (n=10). **(G)** Correlation plots showing the frequency of  
1355 SARS-CoV-2 tri-S<sup>+</sup> IgG<sup>+</sup> RM B cells vs CXCR3<sup>+</sup> cTfh, CXCR3<sup>-</sup> cTfh, cTfh1 and cTfh2.  
1356 Spearman correlation coefficients with the corresponding p-values are indicated. **(H)** Volcano  
1357 plot analysis comparing the immunoglobulin (Ig) gene repertoire of SARS-CoV-2 S-specific  
1358 IgG<sup>+</sup> / IgA<sup>+</sup> B cells from convalescent donors and IgG<sup>+</sup> memory B cells from healthy individuals  
1359 (IgG.mB, unexposed to SARS-CoV-2). Grey and blue dots indicate statistically significant  
1360 differences between both Ig gene repertoires. pV, p-value; FC, fold changes. **(I)** Violin plots  
1361 comparing the number of mutations in V<sub>H</sub> genes of SARS-CoV-2 S-specific and control IgG<sup>+</sup>

1362 memory B cells from unexposed healthy individuals (n=72). The average number of mutations  
1363 is indicated below. Numbers of mutations were compared across groups of antibodies using  
1364 unpaired student t-test with Welch's correction. **(J)** Circos plot (left) showing the clonal variants  
1365 shared between distinct donors with the size of the links proportional to the number of clones  
1366 sharing 75 % CDR<sub>H3</sub> amino acid identity. Cladogram (right) showing the distribution of  
1367 individual shared clones between donors. See also **Table S1** and **Figure S2**.

1368  
1369 **Figure 3. Reactivity and antiviral activities of SARS-CoV-2 S-specific memory B-cell**  
1370 **antibodies. (A)** Heatmap showing the reactivity of human anti-S mAbs (n=101) against SARS-  
1371 CoV-2 antigens and trimeric spike proteins from other coronaviruses ( $\alpha$ -coronaviruses: SARS-  
1372 CoV-1, MERS-CoV, HKU1, and  $\beta$ -coronaviruses: OC43, 229E). RBD, receptor binding  
1373 domain; NTD, N-terminal domain; CD, connecting domain; FP, fusion peptide. Asterisks  
1374 indicate the antibodies tested at a higher IgG concentration. **(B)** Schematic diagram showing  
1375 the distribution of specificities of anti-S antibodies on the highlighted regions of the SARS-  
1376 CoV-2 spike as determined in (A) (ribbon representation of the PDB: 6VXX structure). **(C)**  
1377 Bubble plots showing the neutralization activity of human SARS-CoV-2 S-specific antibodies  
1378 (n=101) tested at a concentration of 10  $\mu$ g/ml in the S-Fuse (Y axis), and pseudoneutralization  
1379 (X axis, PseudoNeut.) assays against SARS-CoV-2. The bubble size corresponds to the  
1380 blocking capacity of SARS-CoV-2 S-ACE2 interactions by the antibodies as measured by  
1381 ELISA. Pie chart (right) show the distribution of non-active (white) vs neutralizing (shades of  
1382 blue) antibodies according to neutralization % measured with the S-Fuse assay. **(D)** Dot plot  
1383 showing the *in vitro* Fc-dependent effector activities of anti-S IgG antibodies (n=101). Pie  
1384 charts (right) show for each measured effector function the distribution of non-active (white) vs  
1385 active (shades of blue) antibodies. ADCC, antibody-dependent cell-mediated cytotoxicity;  
1386 ADCP, antibody-dependent cellular phagocytosis; CDC, complement-dependent cytotoxicity.  
1387 **(E)** Matrix showing the correlation analyses between neutralization activities and Fc-  
1388 dependent effector functions measured for SARS-CoV-2 S-specific IgG antibodies. Spearman  
1389 correlation coefficients (color coded) with their corresponding p values are shown.  
1390 \*\*\*p<0.0001, \*p<0.05. **(F)** Radar plots comparing the *in vitro* neutralizing and Fc-dependent  
1391 effector activities of anti-S IgG antibodies according to their targeted spike domains. Percent  
1392 of antibodies *per* specificity group mediating a given antiviral activity as determined in (D) is  
1393 shown. **(G)** Principal component analysis 2D-plot showing the antiviral-related variables  
1394 discriminating anti-S mAbs color-coded by specificities. The two dimensions account for 77.2%  
1395 of the variability. The location of the variables is associated with the distribution of the  
1396 antibodies. See also **Table S1**.

1397  
1398 **Figure 4. Binding and neutralizing properties of potent anti-RBD neutralizers. (A)** SPR  
1399 sensorgrams comparing the relative affinity of neutralizing anti-RBD IgG antibodies for the  
1400 binding to SARS-CoV-2 S trimers (blue), S1 (purple) and RBD (pink) proteins. Calculated K<sub>D</sub>  
1401 values are indicated at the bottom. **(B)** Competition ELISA graphs (left) comparing the IgG  
1402 binding to SARS-CoV-2 tri-S (top) and RBD (bottom) of selected biotinylated anti-RBD  
1403 antibodies in presence of Cv2.1169 as potential competitor. Means  $\pm$  SD of duplicate values  
1404 are shown. Heatmaps (right) showing the competition of selected anti-RBD nAbs for tri-S and  
1405 RBD binding as measured in Figure S4D. Dark blue indicates stronger inhibition; lighter colors  
1406 indicate weaker competition, and white, no competition. **(C)** Competition ELISA graphs  
1407 showing the binding of biotinylated SARS-CoV-2 tri-S protein to the immobilized soluble ACE2  
1408 ectodomain in presence of anti-RBD antibodies as competitors. Means  $\pm$  SD of duplicate  
1409 values are shown. **(D)** Graphs showing the neutralization curves of SARS-CoV-2 by selected  
1410 anti-RBD IgG antibodies as determined with the pseudo-neutralization (top) and S-Fuse  
1411 neutralization (bottom) assays. Error bars indicate the SD of assay triplicates. IC<sub>50</sub> values are  
1412 indicated in the top left-hand corner (in blue). **(E)** Heatmap comparing the binding of RBD-  
1413 specific IgG antibodies to the cell-expressed spike proteins of SARS-CoV-2 and selected viral  
1414 variants as measured by flow cytometry. Geometric means of duplicate log<sub>10</sub>  $\Delta$ MFI values are  
1415 shown in each cell. **(F)** Heatmaps comparing the binding (left) and RBD-ACE2 blocking  
1416 capacity (right) of RBD-specific IgG antibodies for the RBD proteins of SARS-CoV-2 and

1417 selected viral variants as measured in Figures S4E-4H. Darker blue colors indicate high  
1418 binding or competition while light colors show moderate binding or competition (white = no  
1419 binding or competition). AUC values are shown in each cell. **(G)** Heatmaps comparing the IC<sub>50</sub>  
1420 neutralizing values of the selected anti-RBD antibodies against SARS-CoV-2 and selected  
1421 VOCs with the pseudo-neutralization (top) and S-Fuse neutralization (bottom) assays as  
1422 measured in Figures S5A and S5B. **(H)** Heatmap showing binding to spike and RBD proteins  
1423 (top), RBD-ACE2 blocking capacity (middle), and neutralizing activity (bottom) but for  
1424 Cv2.5179 antibody as measured in Fig S6. **(I)** Radar plot comparing the binding of monomeric  
1425 Cv2.1169 IgG and IgA antibodies to SARS-CoV-2 tri-S, S1 and RBD proteins, and to RBD  
1426 from selected viral variants (in bold) as measured in Figure S4I. **(J)** Competition ELISA graphs  
1427 (left) comparing the binding of biotinylated SARS-CoV-2 tri-S protein to the immobilized soluble  
1428 ACE2 ectodomain in presence of Cv2.1169 IgG or IgA as a competitor. Means ± SD of  
1429 duplicate values are shown. Graphs (right) comparing the SARS-CoV-2 neutralizing activity of  
1430 Cv2.1169 IgG, IgA and IgA Fab as determined with the pseudo-neutralization assay. Error  
1431 bars indicate the SD of duplicate values. **(K)** Graphs comparing the SARS-CoV-2 neutralizing  
1432 activity of monomeric and dimeric IgA (dIgA) Cv2.1169 antibodies as determined with the S-  
1433 Fuse neutralization assay. Error bars indicate the SD of triplicate values. n.dIgA, normalized  
1434 values according to the number of binding sites. See also **Tables S1 and S2**, and **Figures S3,**  
1435 **S4, S5, S6 and S7.**

1436  
1437 **Figure 5. Activity of Cv2.1169 against SARS-CoV-2 Omicron variants.** **(A)** Heatmap (right)  
1438 comparing the binding of RBD-specific IgG antibodies to the cell-expressed (CE) and soluble  
1439 (tri-S) Omicron (o) SARS-CoV-2 spike proteins as measured by flow cytometry (mean log<sub>10</sub>  
1440 ΔMFI from duplicate values) and ELISA (mean AUC from duplicate values), respectively, as  
1441 shown on the left for Cv2.1169. NT ctr, non-transfected cell control. The heatmap also presents  
1442 the comparative antibody reactivity (AUC values) against β and o RBD proteins. White  
1443 indicates no binding. **(B)** Heatmap (bottom) comparing the RBD-ACE2 blocking capacity of  
1444 neutralizing anti-RBD antibodies for the RBD proteins of SARS-CoV-2 and o variant BA.1 as  
1445 shown for Cv2.1169 (top). Darker blue colors indicate high competition while light colors show  
1446 moderate competition (white = no binding or competition). Mean AUC from duplicate values  
1447 are shown in each cell. **(C)** Heatmaps comparing the tri-S binding (top) and tri-S-ACE2  
1448 blocking capacity (bottom) of Cv2.1169 with benchmarked SARS-CoV-2 neutralizers RBD-  
1449 specific IgG antibodies to the SARS-CoV-2 proteins of the o variant BA.1. Darker blue colors  
1450 indicate high binding or competition while light colors show moderate binding or competition  
1451 (white = no binding or competition). Mean EC<sub>50</sub> from duplicate values are shown in each cell.  
1452 **(D)** Heatmap (right) comparing the binding of Cv2.1169 and Cv2.3194 with benchmarked  
1453 SARS-CoV-2 neutralizers for the RBD proteins of the o variant BA.1 and BA.2 as measured  
1454 ELISA (means of duplicate AUC values) as shown on the left for Cv2.1169. Darker blue colors  
1455 indicate high binding while light colors show moderate binding (white = no binding). Mean EC<sub>50</sub>  
1456 from duplicate values are shown in each cell. **(E)** Graphs showing the neutralization curves of  
1457 SARS-CoV-2 δ and o BA.1 by potent anti-RBD IgG antibodies as determined with the S-Fuse  
1458 neutralization assay. Error bars indicate the SD of duplicate values from 2 (Cv2.5179) or 5  
1459 (Cv2.1169 and Cv2.3194) independent experiments. IC<sub>50</sub> values are indicated (in blue for o  
1460 BA.1). ND, not determined. **(F)** Competition ELISA graphs showing the binding of biotinylated  
1461 RBD proteins from SARS-CoV-2 o BA.1 and BA.2 variants to soluble ACE2 ectodomain in  
1462 presence of Cv2.1169 and Cv2.3194 antibodies as competitors. Means ± SD of duplicate  
1463 values are shown. **(G)** Same as in (F) but for Cv2.1169 and Cv2.3194 against BA.2. Error bars  
1464 indicate the SD of duplicate values. **(H)** Graphs comparing the ELISA binding of monomeric  
1465 and dimeric Cv2.1169 IgA antibodies to the RBD proteins of SARS-CoV-2 o BA.1 and BA.2  
1466 variants. Means ± SD of duplicate values are shown. n.dIgA, normalized values according to  
1467 the number of binding sites. **(I)** Same as in (E) but for Wuhan and o BA.1 tri-S proteins with  
1468 monomeric and dimeric Cv2.1169 IgA antibodies. Means ± SD of duplicate values are shown.  
1469 n.dIgA, normalized values according to the number of binding sites. **(J)** Same as in (F) but for  
1470 Cv2.1169 IgA monomers and J-chain dimers (dIgA) against BA.1 and BA.2. Error bars indicate

1471 the SD of duplicate values. Heatmap (right) presents the IC<sub>50</sub> values calculated from the curves  
1472 (left). n.dIgA, normalized values according to the number of binding sites.  
1473

1474 **Figure 6. Structural analyses of the Cv2.1169 epitope. (A)** Crystal structure of the complex  
1475 formed by the Receptor Binding Domain (RBD) and Cv2.1169. The RBD is represented in  
1476 cartoon with a transparent surface, highlighting the Receptor Binding Motif (RBM, yellow) and  
1477 residues that are mutated in the Variants of Concern (VOCs, red). The constant domain from  
1478 Cv2.1169 could not be built on the residual electron density and the variable domains are  
1479 indicated in different shades of blue (IgH, dark blue; IgL, light blue). **(B)** Superposition of the  
1480 RBD-Cv2.1169 and RBD-ACE2 (PDB: 6M0J) structures, showing the receptor on surface  
1481 representation (light yellow) and its clashes with the antibody. **(C)** Close-up at the RBD-  
1482 Cv2.1169 interface. For clarity, only the side chains from residues forming hydrogen bonds  
1483 (dashed lines) are shown as sticks. Residues mutated in the VOCs are in red and the CDR<sub>H3</sub>  
1484 disulfide bond is indicated with yellow sticks. **(D)** Details of the hydrophobic residues that  
1485 anchor F486 at the interface between the light and heavy chains of Cv2.1169. **(E)** Identification  
1486 of the Cv2.1169 epitope (blue) on the structure of a closed spike (PDB: 6VXX). The different  
1487 protomers are identified with a subscript letter and colored in light grey (protomer A), dark grey  
1488 (protomer B) and wheat (protomer C). **(F)** Cryo-EM map from the trimeric spike ectodomain in  
1489 complex with Cv2.1169. See also **Tables S3-S5**, and **Figures S8, S9** and **S10**.  
1490

1491 **Figure 7. *In vivo* therapeutic activity of potent SARS-CoV-2 neutralizer Cv2.1169. (A)**  
1492 Schematic diagram showing the experimental design of Cv2.1169 antibody therapy in SARS-  
1493 CoV-2-infected K18-hACE2 mice (top). Animals were infected intranasally (i.n.) with 10<sup>4</sup>  
1494 plaque forming units (PFU) of SARS-CoV-2 and received 6 h later an intraperitoneal (i.p.)  
1495 injection of Cv2.1169 or isotypic control IgG antibody at ~ 10 mg/kg (0.25 mg) and ~ 20 mg/kg  
1496 (0.5 mg). Graphs showing the evolution of initial body weight (% Δ weight, bottom left) and  
1497 survival rate (bottom right) in animal groups. Groups of mice were compared in the Kaplan-  
1498 Meier analysis using Log-rank Mantel-Cox test. **(B)** Same as in (A) but with K18-hACE2 mice  
1499 infected with 10<sup>5</sup> PFU and treated 22 h later with 1 mg i.p. of Cv2.1169 IgG antibody (~ 40  
1500 mg/kg). **(C)** Same as in (A) but with infected mice treated with Cv2.1169 IgG and IgA antibodies  
1501 at ~ 5 mg/kg (0.125 mg). **(D)** Schematic diagram shows the experimental design of Cv2.1169  
1502 antibody therapy in SARS-CoV-2-infected golden Syrian hamsters (top). Animals were  
1503 infected intranasally (i.n.) with 6x10<sup>4</sup> plaque forming units (PFU) of SARS-CoV-2 and received  
1504 24 h later an intraperitoneal (i.p.) injection of PBS, Cv2.1169 or isotypic control IgG antibody  
1505 at ~ 10 mg/kg (1 mg). Dot plots showing the lung weight / body weight ratio (LW/BW) x 100  
1506 (left), infectivity (center) and RNA load (right) measured in animal groups at 5 dpi. Groups of  
1507 hamsters were compared using two-tailed Mann-Whitney test. **(E)** Same as in (D) but with  
1508 infected animals treated 4 h later with Cv2.1169 IgG and IgA antibodies at ~ 5 mg/kg (0.5 mg).  
1509 **(F)** Same as in (A) but with K18-hACE2 mice infected with 10<sup>4</sup> PFU of the SARS-CoV-2 variant  
1510 β (B.1.351), and either pre-treated 6h before infection with ~ 5 mg/kg (0.5 mg) of Cv2.1169  
1511 IgA or treated 6h post-infection with ~ 5 mg/kg (0.5 mg) of Cv2.1169 IgG or isotype control  
1512 (ctr). See also **Figures S11**.



**Figure 1**

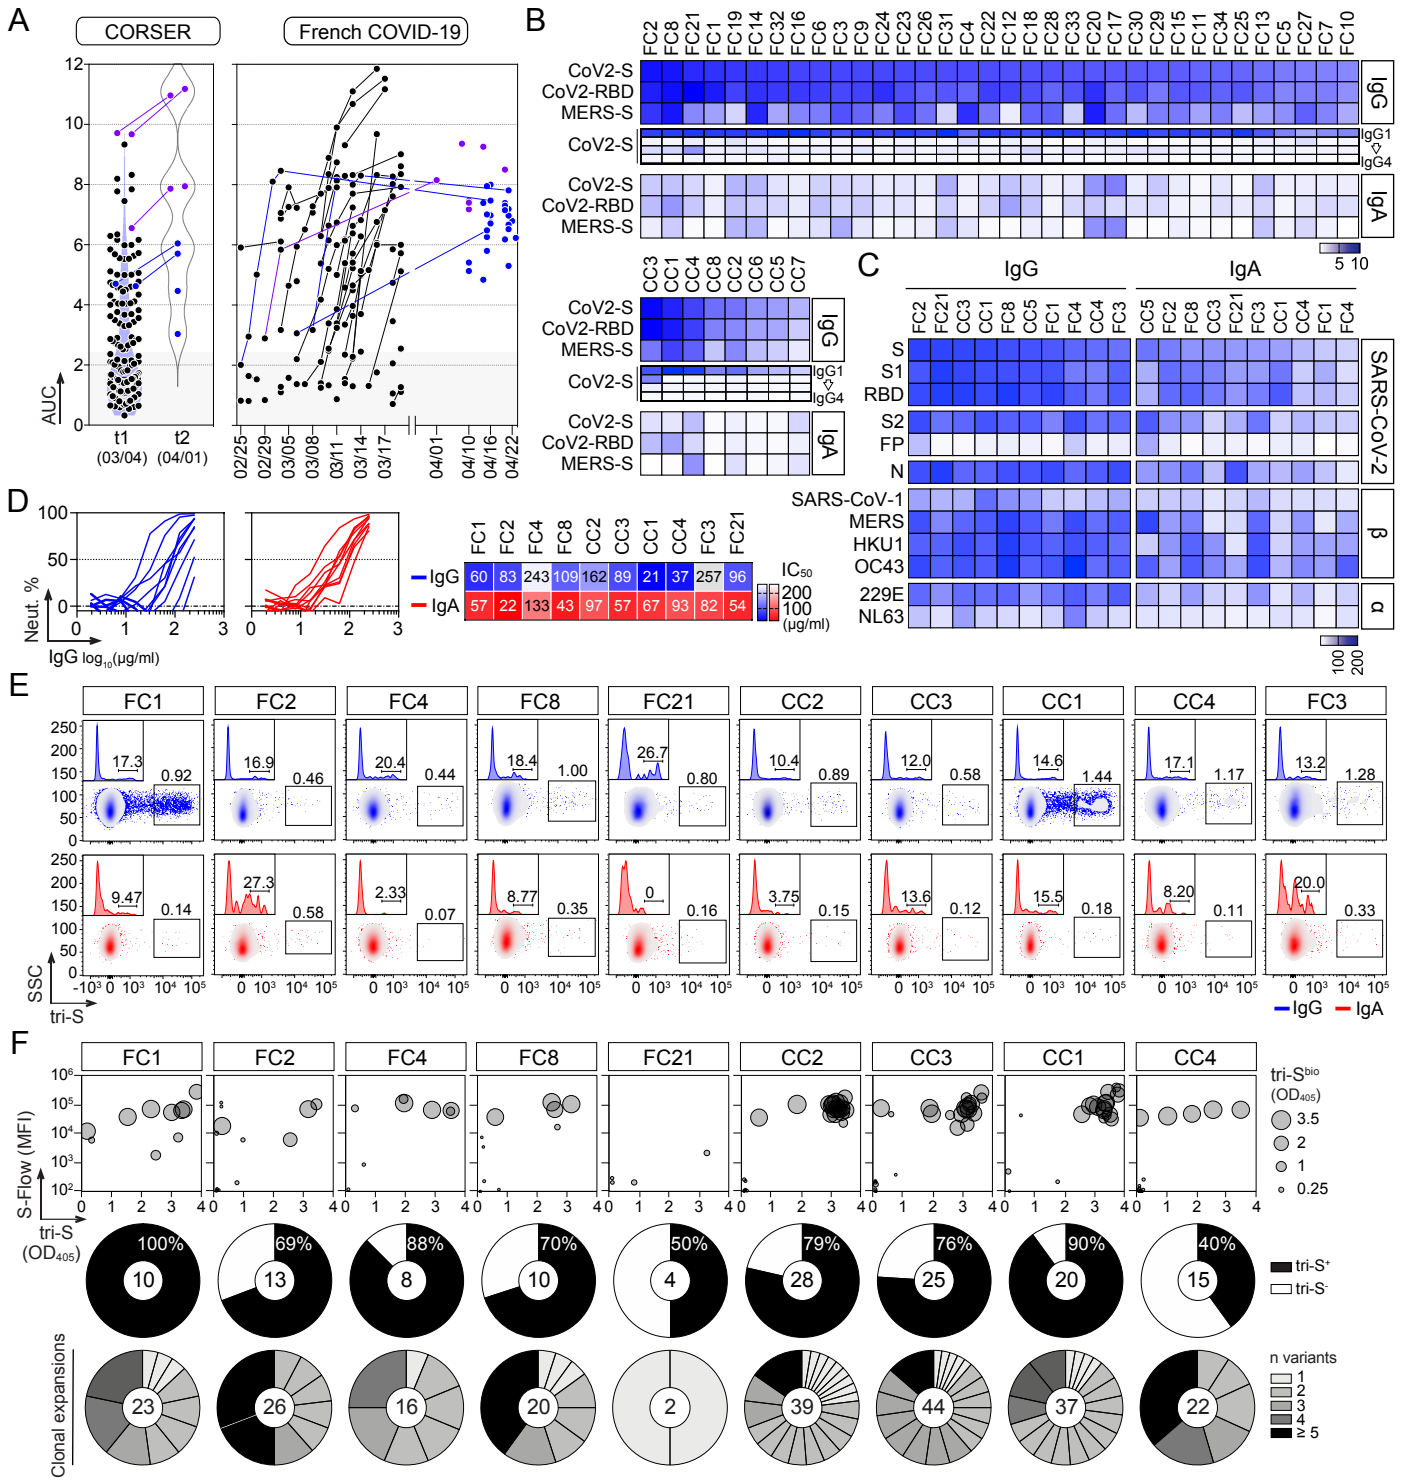

**Figure 2**

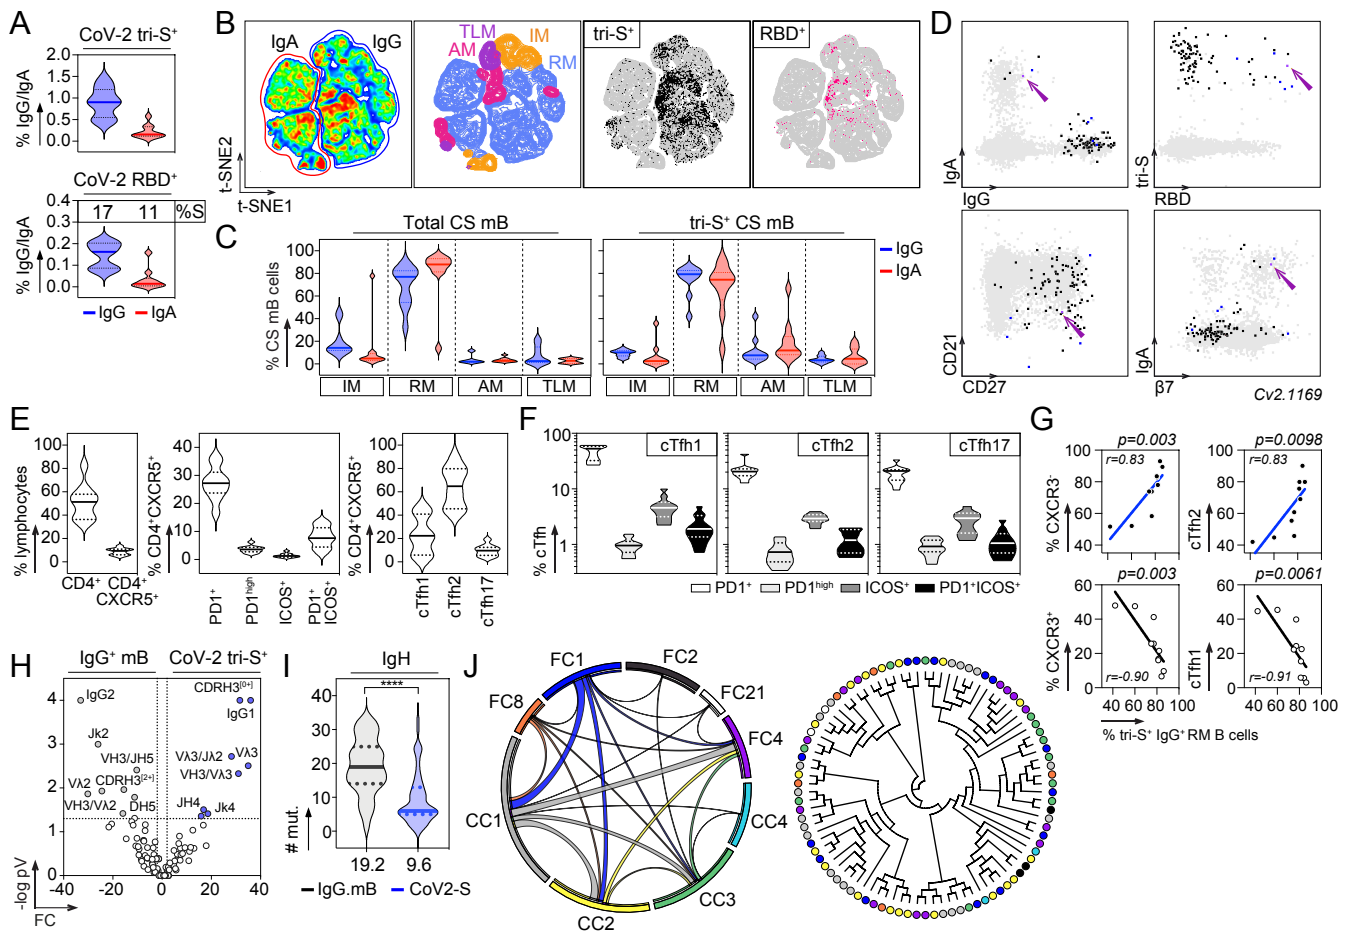

**Figure 3**

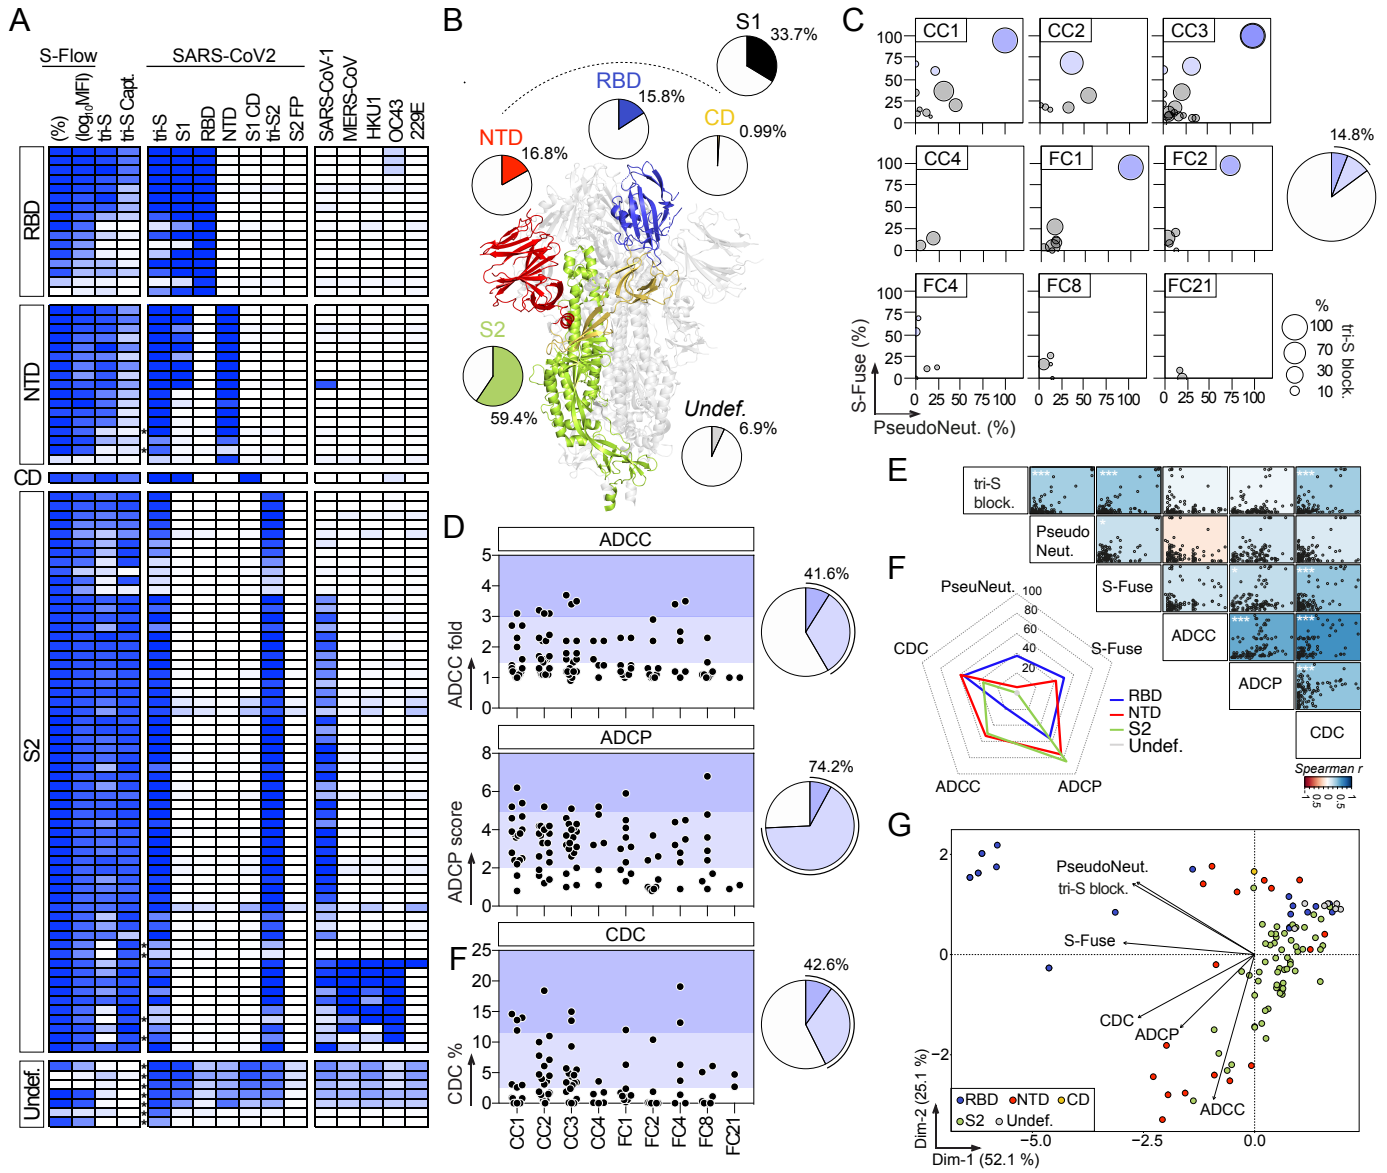

**Figure 4**

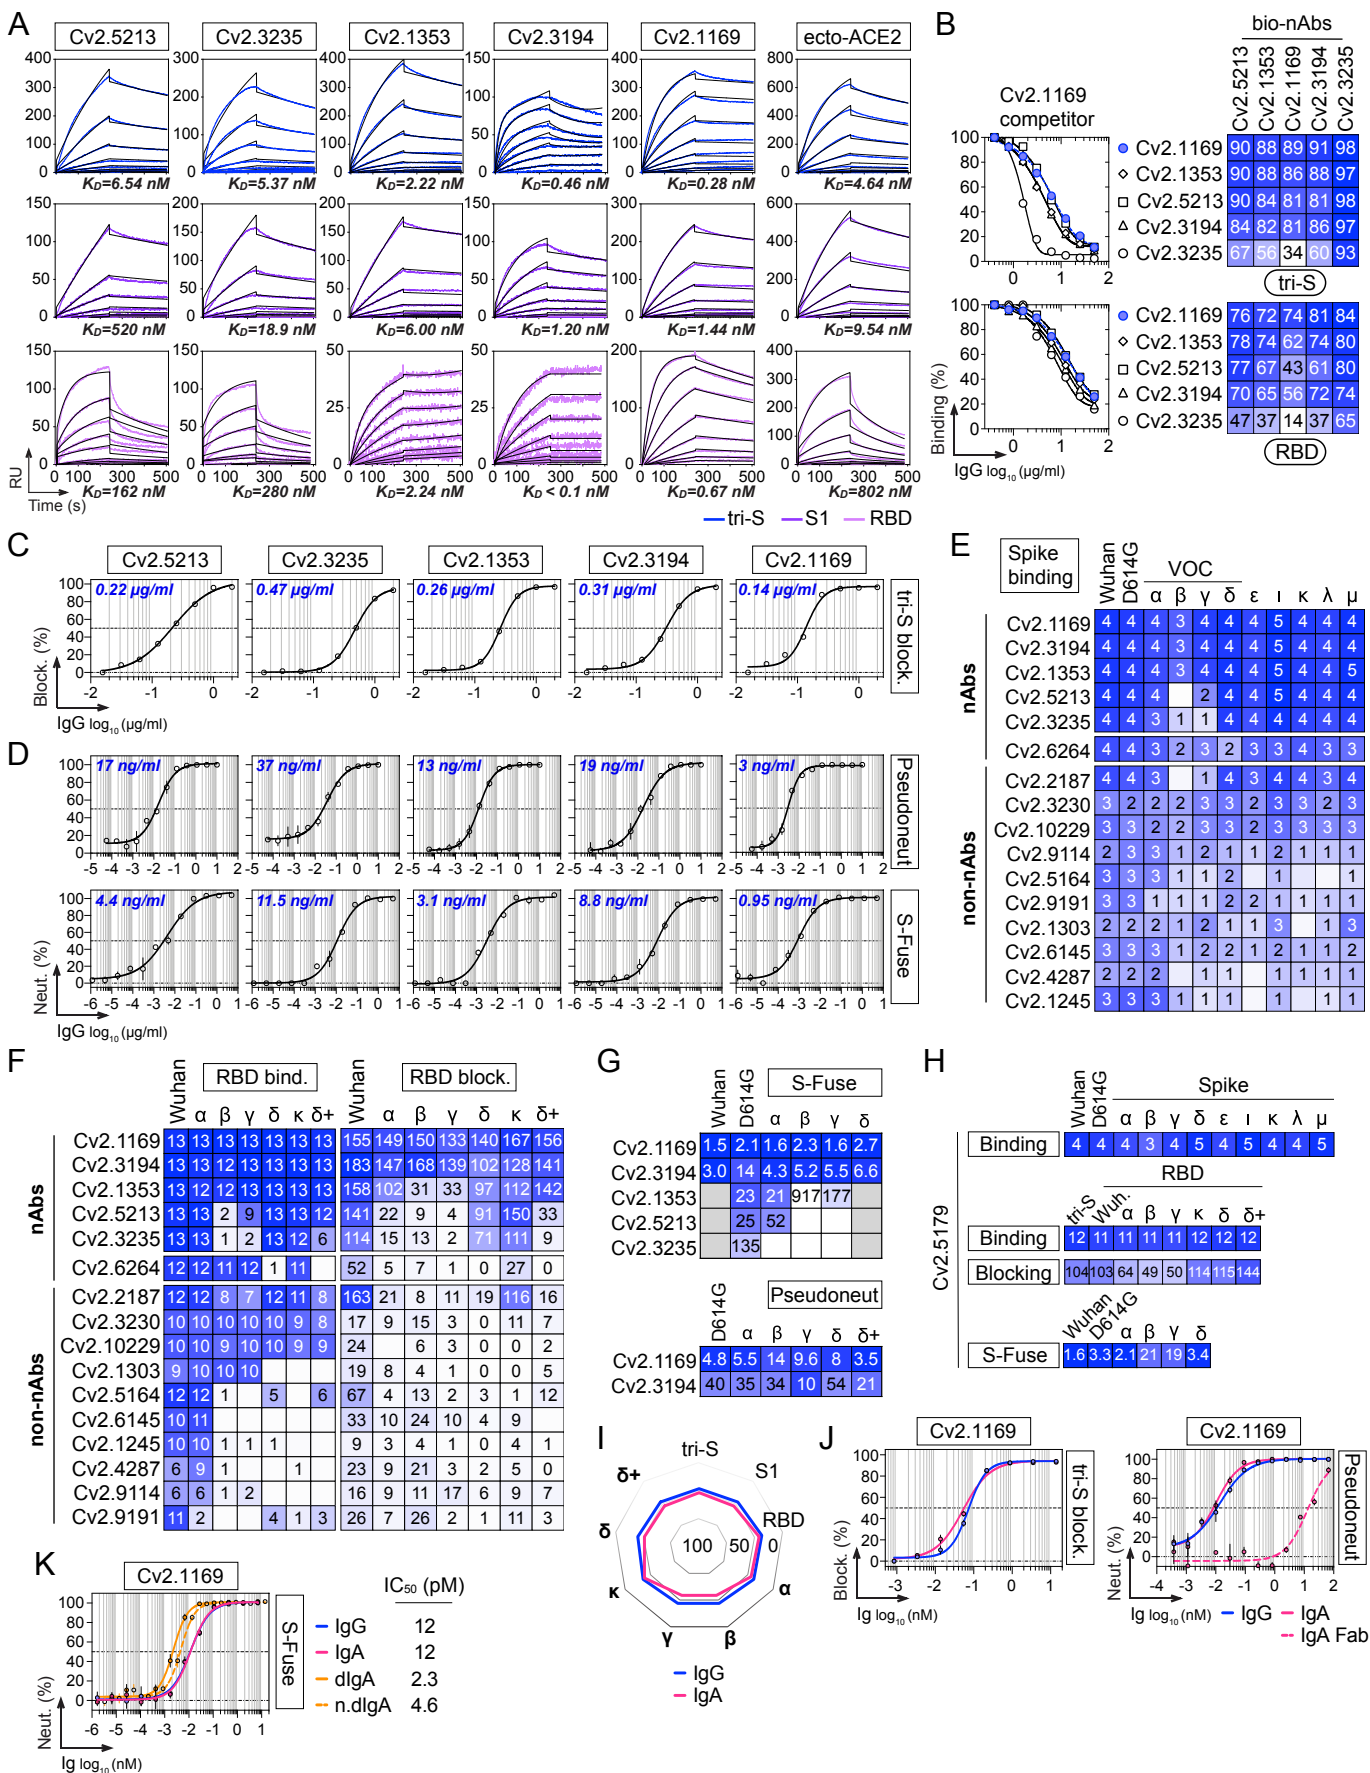

**Figure 5**

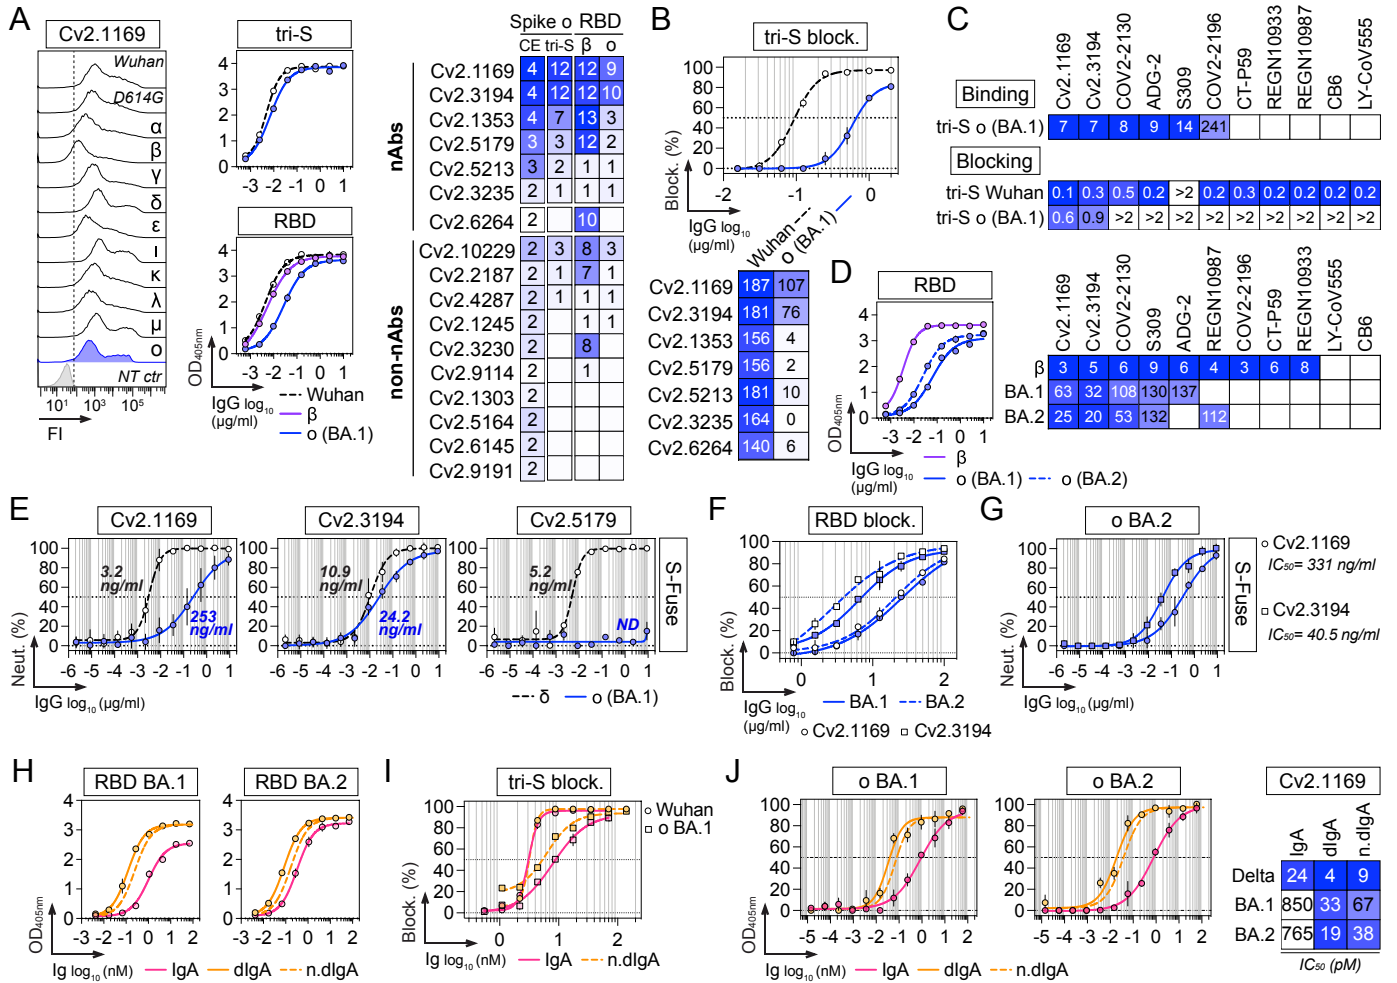

**Figure 6**

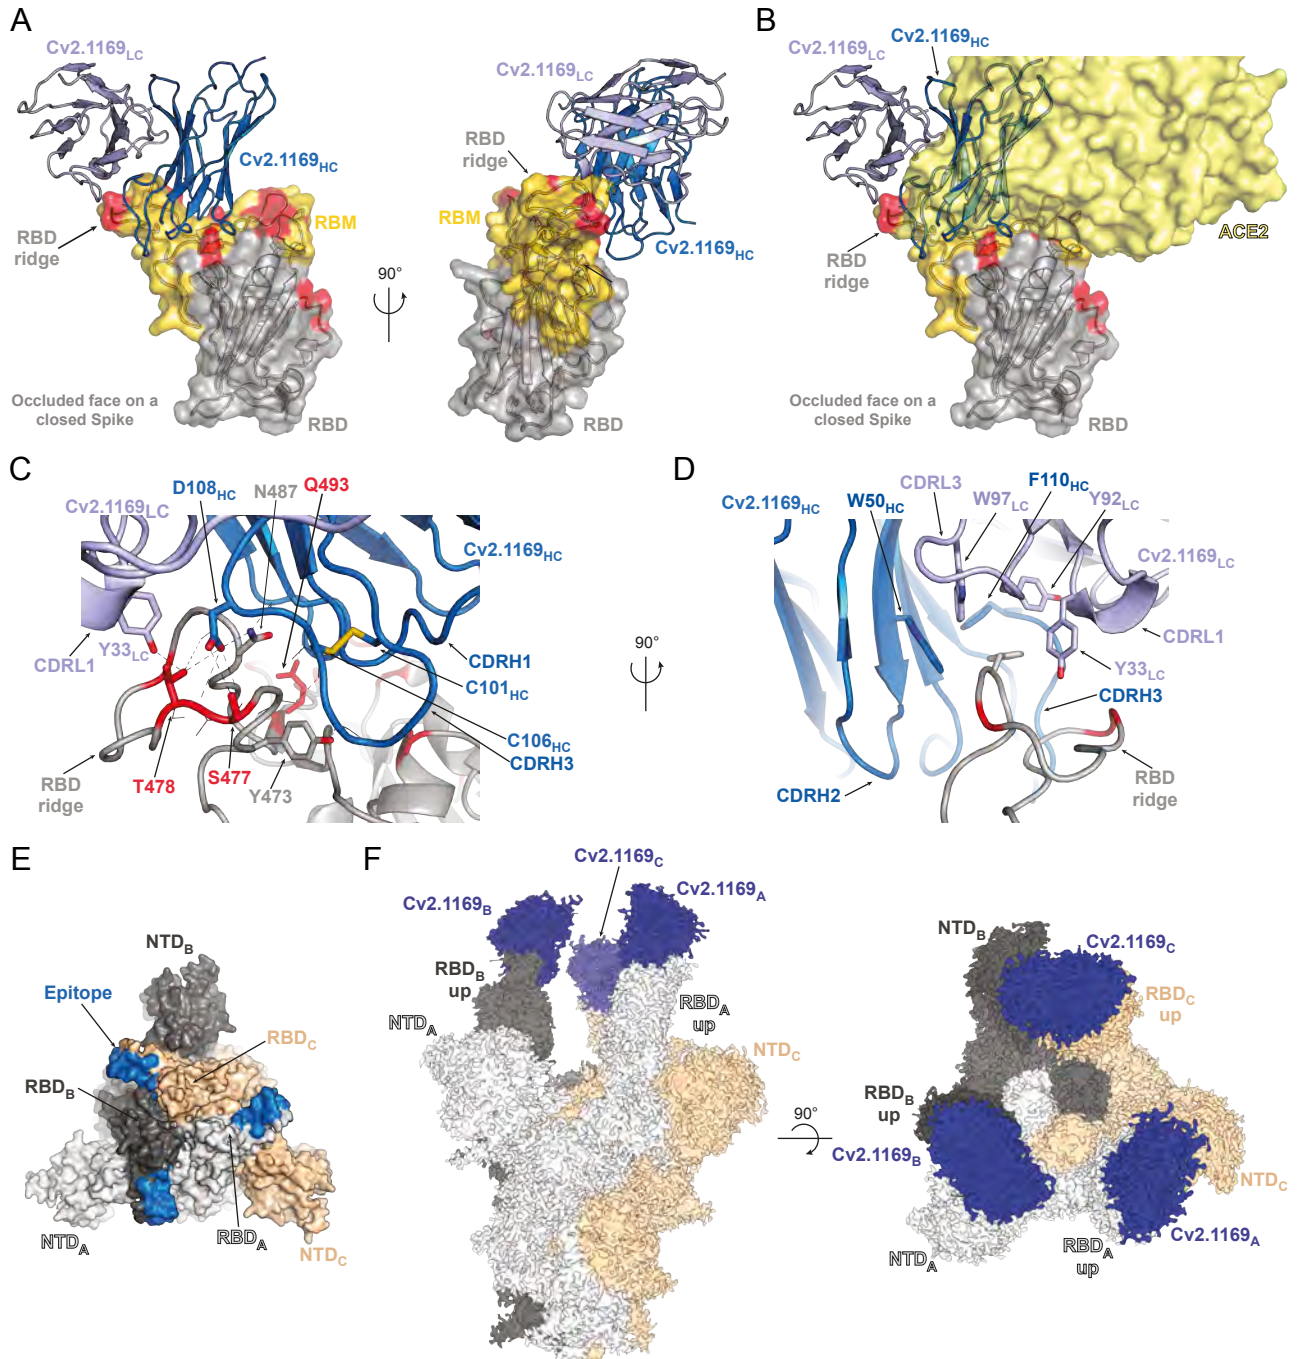

**Figure 7**

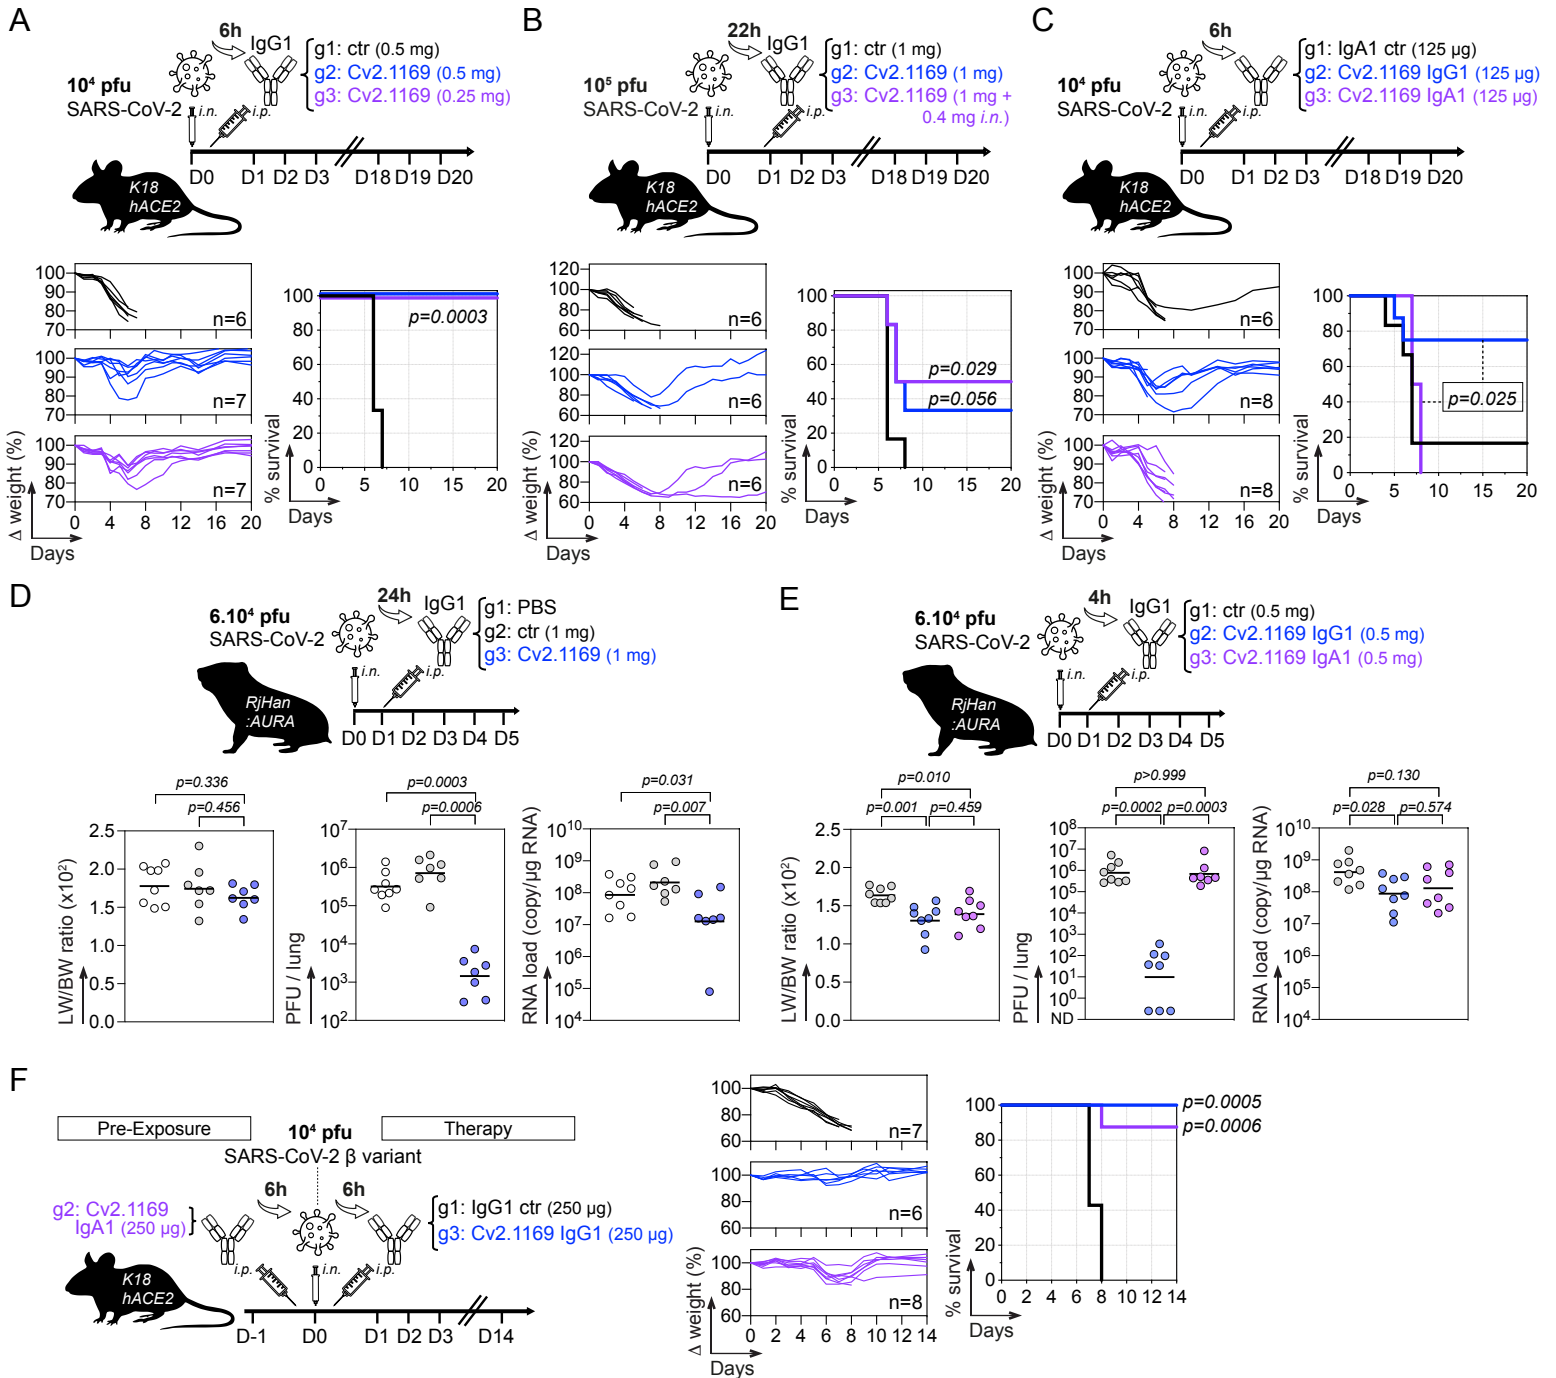

Source: https://www.biorxiv.org/content/10.1101/2022.04.01.486719v1.full.pdf
